# Supplementary material for: Bayesian Inference Associates Rare KDR Variants With Specific Phenotypes in Pulmonary Arterial Hypertension
Source: PubMed Central journal article supplement (PMC7892262; doi:10.1161/circgen.120.003155), 2020-12-15
Supplement: hcg-14-e003155-s001.pdf [file hcg-14-e003155-s001.pdf]

## SUPPLEMENTAL MATERIAL

### Methods

#### Cohort description

Carriers of Val122Ile (NM\_000371.3:c.424G>A) risk allele were selected from the Yale-Penn cohort,<sup>1-4</sup> whose medical history was obtained as part of the phenotyping effort, as previously reported<sup>5</sup>. In accordance with the International Society of Amyloidosis nomenclature committee<sup>6</sup> amyloid fibril protein variants are named according to the substitution or deletion in the mature amyloid protein (e.g., TTR V30M). The

We investigated two binary phenotypes – self-reported history of heart disease (“*Has a doctor ever told you that you have (had) a heart disease?*”) and having had 10 or more outpatient surgeries. We previously reported that these two phenotypes were associated with the Val122Ile mutation in the Yale-Penn cohort<sup>5</sup>. We assayed 104 African Americans, samples from 8 of which failed the assay, leaving 96 carriers for analysis (mean age =  $42.16 \pm 9.9$  [SD] yrs.). Epigenomic differences were tested with respect to the history of heart disease (N=90 controls; 6 cases; Males-47%) and 10 or more outpatient surgeries (N=94 controls, 2 cases; Males-46%).

The significant methylation sites were investigated in an independent cohort of Italian participants of European descent. This study included 48 carriers of *TTR* mutations (Val30Met, Phe64Leu, Ile68Leu, Ala120Ser, and Val122Ile) with the diagnosis of TTR amyloidosis confirmed via positive amyloid fibril deposition in addition to clinical symptoms<sup>7</sup>. Thirty-two healthy individuals with none of the *TTR* mutations or clinical symptoms from the same local area were recruited as controls. Detailed information regarding this cohort was previously reported<sup>8,9</sup>. The methylation array analysis was performed at the Connecting Bio-research and Industry Center, Trieste, Italy, using the same sample protocol implemented in the Yale-Penn cohort.

### **Sample and array processing**

DNA was extracted from whole blood of Yale-Penn participants using the EZ-96 DNA methylation kit (Zymo Research, CA, USA). As previously described<sup>4</sup>, the samples were genotyped at the Yale Center for Genome Analysis (YCGA), the Center for Inherited Disease Research, and the Gelernter laboratory at Yale (VA CT) using genome-wide arrays (Illumina HumanOmni1-Quad v1.0 and Illumina HumanCoreExome arrays), the imputation was performed with IMPUTE2.0, and principal components were derived on the QC'd genomic data . The Val122Ile – rs76992529 probe was genotyped in the HumanCoreExome array and imputed in the HumanOmni1-Quad v1.0 array with high imputation quality (INFO score = 0.98) to determine TTR carriers in the African-American Yale-Penn participants<sup>5</sup>. DNA methylation was assayed using the Illumina Infinium MethylationEPIC chip quantifying >850,000 CpG sites and imaged on the Illumina iScan system at YCGA. The methylation intensity data (\*.idat files) was exported for analysis using the manufacturer's recommended protocol using the GenomeStudio methylation module.

### **DNA methylation analysis**

All analyses were performed in R 3.6. The methylation intensity files (\*.idat) were imported into *ChAMP*<sup>10</sup> for post-processing and normalization. The beta values, ranging from 0 to 1 were generated for all CpG sites representing the ratio of methylated to unmethylated fluorescent intensities. Primary QC removed CpG sites with low detection p-value, missing beads, sites near SNPs, multi-hit and non-autosomal sites. The beta values of the remaining 737,385 sites were normalized using the beta mixture quantile (BMIQ) method, followed by analysis of batch effects using singular vector decomposition. Technical batch effects for array and slide were corrected using ComBat. The blood cell-type composition and smoking status<sup>11</sup> was derived from methylation data. The association analysis for CpG sites was performed on M-values (transformed beta values) using empirical Bayes methods implemented in the *limma* package. The association was

adjusted for age, sex, tobacco use, smoking, genotype-derived principal components 1-10, and blood cell type proportions: CD8+T cells, CD4+ T cells, natural killer cells, B-cells, monocytes, and neutrophils. Genomic inflation was calculated using the *QQperm* package; both phenotypic associations had a lambda of 1 or less (Heart Disease – 1.01 and Outpatient Surgery – 0.92) indicating lack of population substructure bias. Due to the unbalanced case-control proportions, we also performed permutation of the association using the *CpGassoc* package<sup>12</sup>. Differential methylation of regions was calculated using *DMRcate*. The sites and regions were deemed significant considering a false discovery rate of  $<0.05$  ( $FDR_{p\text{-value}} < 0.05$ ). Differentially expressed PPI network modules were investigated using the *FEM* package<sup>13</sup>. Gene ontology using significant genes mapped from significant CpG sites and regions was assessed with *ShinyGO*<sup>14</sup>. The cis-methylation QTL (association between SNPs and significant methylated CpG sites) was performed with all the aforementioned covariates using *MatrixQTL*<sup>15</sup>, wherein the local distance was defined using the biologically expected and default value of 1 Mb between SNP and CpG sites. Significant associations were identified using genomic control adjustment (GC) p-values  $< 0.05$ , in addition to  $FDR_{p\text{-value}} < 0.05$ . Epigenetic age – defined as the cumulative score of specific CpG sites across the genome -- was calculated using Hannum and Horvath's clock from the *wateRmelon* package<sup>16</sup>. As suggested by the developers of each of the epigenetic clocks, biological age, and chronological age were significantly correlated,  $R \geq 0.90$ ;  $p < 0.001$ . The difference in the epigenetic (biological) age between cases and controls was tested using Student's t-test. The network connecting all of the significant genes detected from the above analyses was constructed using GeneMANIA<sup>17</sup>. The results were visualized using ggplot2, coMET<sup>18</sup>, and FUMA<sup>19</sup>.

## Medical history of TTR Val122Ile carriers

|                                                       | Heart Disease (N) |      | p-value | 10 or more outpatient surgeries (N) |    | p-value |
|-------------------------------------------------------|-------------------|------|---------|-------------------------------------|----|---------|
|                                                       | Yes               | No   |         | Yes                                 | No |         |
| <b>Medical history</b>                                |                   |      |         |                                     |    |         |
| <b>Migraine</b>                                       |                   |      |         |                                     |    |         |
|                                                       | No                | 6 80 | 1.00    | 2 84                                |    | 1.00    |
|                                                       | Yes               | 0 10 |         | 0 10                                |    |         |
| <b>Brain Injury/<br/>concussion</b>                   |                   |      |         |                                     |    |         |
|                                                       | No                | 6 85 | 1.00    | 2 89                                |    | 1.00    |
|                                                       | Yes               | 0 5  |         | 0 5                                 |    |         |
| <b>Been unconscious<br/>for longer than 5<br/>min</b> |                   |      |         |                                     |    |         |
|                                                       | No                | 4 82 | 0.11    | 2 84                                |    | 1.00    |
|                                                       | Yes               | 2 8  |         | 0 10                                |    |         |
| <b>Epilepsy/Seizure</b>                               |                   |      |         |                                     |    |         |
|                                                       | No                | 6 85 | 1.00    | 2 89                                |    | 1.00    |
|                                                       | Yes               | 0 5  |         | 0 5                                 |    |         |
| <b>Meningitis/<br/>encephalitis</b>                   |                   |      |         |                                     |    |         |
|                                                       | No                | 6 90 | N.A     | 2 90                                |    | N.A.    |
|                                                       | Yes               | 0 0  |         | 0 0                                 |    |         |
| <b>Stroke</b>                                         |                   |      |         |                                     |    |         |
|                                                       | No                | 6 89 | 1.00    | 2 93                                |    | 1.00    |
|                                                       | Yes               | 0 1  |         | 0 1                                 |    |         |
| <b>Liver disease</b>                                  |                   |      |         |                                     |    |         |
|                                                       | No                | 6 83 |         | 2 87                                |    | 1.00    |
|                                                       | Yes               | 0 7  |         | 0 7                                 |    |         |
| <b>Thyroid disease</b>                                |                   |      |         |                                     |    |         |
|                                                       | No                | 5 86 | 0.28    | 2 89                                |    | 1.00    |
|                                                       | Yes               | 1 4  |         | 0 5                                 |    |         |
| <b>Asthma</b>                                         |                   |      |         |                                     |    |         |
|                                                       | No                | 4 74 | 0.31    | 2 76                                |    | 1.00    |
|                                                       | Yes               | 2 16 |         | 0 18                                |    |         |
| <b>Diabetes</b>                                       |                   |      |         |                                     |    |         |
|                                                       | No                | 4 81 | 0.13    | 2 83                                |    | 1.00    |
|                                                       | Yes               | 2 9  |         | 0 11                                |    |         |
| <b>Cancer</b>                                         |                   |      |         |                                     |    |         |
|                                                       | No                | 5 88 | 0.17    | 2 91                                |    | 1.00    |
|                                                       | Yes               | 1 22 |         | 0 3                                 |    |         |
| <b>HIV</b>                                            |                   |      |         |                                     |    |         |
|                                                       | No                | 6 86 | 1       | 2 90                                |    | 1.00    |
|                                                       | Yes               | 0 4  |         | 0 4                                 |    |         |

## References

1. Polimanti R, Meda SA, Pearlson GD, Zhao H, Sherva R, Farrer LA, Kranzler HR, Gelernter J. S100A10 identified in a genome-wide gene  $\times$  cannabis dependence interaction analysis of risky sexual behaviours. *Journal of Psychiatry & Neuroscience*. 2017;42(4):252–261.
2. Polimanti R, Kaufman J, Zhao H, Kranzler HR, Ursano RJ, Kessler RC, Gelernter J, Stein MB. A genome-wide gene-by-trauma interaction study of alcohol misuse in two independent cohorts identifies PRKG1 as a risk locus. *Molecular Psychiatry*. 2018;23(1):154–160.
3. Polimanti R, Wang Q, Meda SA, Patel KT, Pearlson GD, Zhao H, Farrer LA, Kranzler HR, Gelernter J. The Interplay Between Risky Sexual Behaviors and Alcohol Dependence: Genome-Wide Association and Neuroimaging Support for LHPP as a Risk Gene. *Neuropsychopharmacology*. 2017;42(3):598–605.
4. Polimanti R, Zhang H, Smith AH, Zhao H, Farrer LA, Kranzler HR, Gelernter J. Genome-wide association study of body mass index in subjects with alcohol dependence. *Addiction Biology*. 2017;22(2):535–549.
5. Polimanti R, Nuñez YZ, Gelernter J. Increased Risk of Multiple Outpatient Surgeries in African-American Carriers of Transthyretin Val122Ile Mutation Is Modulated by Non-Coding Variants. *Journal of clinical medicine*. 2019;8(2).
6. Benson MD, Buxbaum JN, Eisenberg DS, Merlini G, Saraiva MJM, Sekijima Y, Sipe JD, Westermark P. Amyloid nomenclature 2018: recommendations by the International Society of Amyloidosis (ISA) nomenclature committee. *Amyloid*. 2018;25(4):215–219.
7. De Lillo A, Pathak GA, De Angelis F, Di Girolamo M, Luigetti M, Sabatelli M, Perfetto F, Frusconi S, Manfellotto D, Fuciarelli M, Polimanti R. Epigenetic profiling of Italian patients identified methylation sites associated with hereditary transthyretin amyloidosis. *Clinical epigenetics*. 2020;12(1):176.
8. Iorio A, De Angelis F, Di Girolamo M, Luigetti M, Pradotto L, Mauro A, Manfellotto D, Fuciarelli M, Polimanti R. Most recent common ancestor of TTR Val30Met mutation in Italian population and its potential role in genotype-phenotype correlation. *Amyloid*. 2015;22(2):73–78.
9. Iorio A, De Lillo A, De Angelis F, Di Girolamo M, Luigetti M, Sabatelli M, Pradotto L, Mauro A, Mazzeo A, Stancanelli C, Perfetto F, Frusconi S, My F, Manfellotto D, Fuciarelli M, et al. Non-coding variants contribute to the clinical heterogeneity of TTR amyloidosis. *European Journal of Human Genetics*. 2017;25(9):1055–1060.
10. Tian Y, Morris TJ, Webster AP, Yang Z, Beck S, Feber A, Teschendorff AE. ChAMP: updated methylation analysis pipeline for Illumina BeadChips. *Bioinformatics*. 2017;33(24):3982–3984.
11. McCartney DL, Stevenson AJ, Hillary RF, Walker RM, Bermingham ML, Morris SW, Clarke T-K, Campbell A, Murray AD, Whalley HC, Porteous DJ, Visscher PM, McIntosh AM, Evans KL, Deary IJ, et al. Epigenetic signatures of starting and stopping smoking. *EBioMedicine*. 2018;37:214–220.
12. Barfield RT, Kilaru V, Smith AK, Conneely KN. CpGassoc: an R function for analysis of DNA methylation microarray data. *Bioinformatics*. 2012;28(9):1280–1281.

13. Jiao Y, Widschwendter M, Teschendorff AE. A systems-level integrative framework for genome-wide DNA methylation and gene expression data identifies differential gene expression modules under epigenetic control. *Bioinformatics*. 2014;30(16):2360–2366.
14. Ge SX, Jung D, Yao R. ShinyGO: a graphical gene-set enrichment tool for animals and plants. *Bioinformatics*. 2020;36(8):2628–2629.
15. Shabalin AA. Matrix eQTL: ultra fast eQTL analysis via large matrix operations. *Bioinformatics*. 2012;28(10):1353–1358.
16. Pidsley R, Wong CC, Volta M, Lunnon K, Mill J, Schalkwyk LC. A data-driven approach to preprocessing Illumina 450K methylation array data. *BMC Genomics*. 2013;14:293.
17. Montojo J, Zuberi K, Rodriguez H, Bader GD, Morris Q. GeneMANIA: Fast gene network construction and function prediction for Cytoscape. [version 1; peer review: 2 approved]. *F1000Research*. 2014;3:153.
18. Martin TC, Yet I, Tsai P-C, Bell JT. coMET: visualisation of regional epigenome-wide association scan results and DNA co-methylation patterns. *BMC Bioinformatics*. 2015;16:131.
19. Watanabe K, Taskesen E, van Bochoven A, Posthuma D. Functional mapping and annotation of genetic associations with FUMA. *Nature Communications*. 2017;8(1):1826.

**Table of Contents**

Table S1: Differentially methylation sites ..... 2

    A. HEART DISEASE ..... 2

    B. OUTPATIENT SURGERIES  $\geq 10$ ..... 3

Table S2: Differentially methylated regions ..... 4

Table S3: Over represented gene ontology for genes identified via differentially methylated sites and regions..... 5

Table S4: Functional PPI modules ..... 5

    A. HEART DISEASE ..... 5

    B. OUTPATIENT SURGERIES  $\geq 10$ ..... 7

Table S5: Local quantitative trait loci (SNPs) for methylated sites (mQTL) ..... 7

Table S6: Epigenomic age ..... 8

Table S7:  $\Delta$  DNAm age (difference in epigenetic and chronological age) ..... 8

**Table S1: Differentially methylation sites**

**A. HEART DISEASE**

| chr | pos       | strand | Name       | Relation to Island | UCSC RefGene Group                 | HMM Island            | GencodeBasic V12 NAME                           | DNase Hypersensitivity NAME | DNase Hypersensitivity Evidence Count | OpenChromatin NAME       | OpenChromatin Evidence Count | logFC  | Ave Expr | t      | P.Value  | adj.P.Val | B     | Permutation P-value | Permutation FDR P-value |
|-----|-----------|--------|------------|--------------------|------------------------------------|-----------------------|-------------------------------------------------|-----------------------------|---------------------------------------|--------------------------|------------------------------|--------|----------|--------|----------|-----------|-------|---------------------|-------------------------|
| 9   | 130286880 | -      | cg06641417 | N_Shelf            | Body;Body                          |                       | FAM129B                                         | chr9:130286700-130287035    | 3                                     |                          |                              | -1.822 | 3.671    | -6.572 | 7.35E-09 | 0.0031    | 6.037 | 1.62027E-08         | 0.0053                  |
| 1   | 2213966   | +      | cg26033908 | S_Shore            | Body                               | 1:2201881-2203883     | SKI                                             |                             |                                       | chr1:2213946-2216731     | 6                            | -1.615 | 4.348    | -6.537 | 8.51E-09 | 0.0031    | 5.949 | 1.7385E-08          | 0.0053                  |
| 6   | 170102056 | +      | cg14890866 | Island             | 1stExon;1stExon;TSS200;5'UTR;5'UTR | 6:169843601-169844984 | WDR27;WDR27;WDR27;C6orf120;C6orf120;WDR27;WDR27 |                             |                                       | chr6:170101364-170103125 | 6                            | -2.028 | 5.709    | -6.434 | 1.30E-08 | 0.0032    | 5.693 | 2.96666E-08         | 0.0055                  |
| 2   | 191745248 | +      | cg15522719 | N_Shore            | TSS1500                            | 2:191453290-191455085 | GLS;GLS                                         |                             |                                       | chr2:191744426-191748461 | 6                            | -1.731 | 7.329    | -6.301 | 2.25E-08 | 0.0042    | 5.361 | 4.6856E-08          | 0.0069                  |
| 8   | 126391560 | +      | cg18546846 | OpenSea            |                                    |                       |                                                 |                             |                                       | chr8:126390915-126391669 | 5                            | -0.786 | 3.859    | -6.235 | 2.96E-08 | 0.0044    | 5.196 | 2.14499E-08         | 0.0053                  |



**B. OUTPATIENT SURGERIES ≥ 10**

| chr | pos       | strand | Name       | Relation to Island | UCSC RefGene Group      | HMM Island             | GencodeBasicV12 NAME               | DNase Hypersensitivity NAME | DNase Hypersensitivity Evidence Count | OpenChromatin NAME      | OpenChromatin Evidence Count | logFC  | AveExpr | t      | P.Value  | adj.P.Val | B      | Permutation P-value | Permutation FDR P-value |
|-----|-----------|--------|------------|--------------------|-------------------------|------------------------|------------------------------------|-----------------------------|---------------------------------------|-------------------------|------------------------------|--------|---------|--------|----------|-----------|--------|---------------------|-------------------------|
| 22  | 44756530  | -      | cg25814327 | OpenSea            |                         |                        |                                    |                             |                                       | chr22:44756108-44757661 | 6                            | -2.075 | 4.465   | -6.385 | 1.57E-08 | 0.012     | -1.283 | 3.02092E-08         | 0.0223                  |
| 16  | 5008289   | -      | cg03718655 | OpenSea            | TSS200                  | 16:4947946-4948690     | SEC14L5                            | chr16:5007725-5008690       | 3                                     |                         |                              | -2.673 | -4.698  | -6.027 | 6.83E-08 | 0.015     | -1.543 | 1.49374E-07         | 0.0332                  |
| 10  | 127059333 | -      | cg05189127 | OpenSea            |                         | 10:127049298-127049395 |                                    | chr10:127059185-127059435   | 3                                     |                         |                              | 1.885  | 0.619   | 5.986  | 0.000    | 8.09E-08  | -1.574 | 1.41261E-07         | 0.0332                  |
| 2   | 181846570 | -      | cg13998023 | S Shore            | 5'UTR;5'UTR;5'UTR;5'UTR |                        | UBE2E3;UBE2E3;UBE2E3;UBE2E3;UBE2E3 | chr2:18184600-181846690     | 3                                     |                         |                              | -2.632 | -4.821  | -5.978 | 8.35E-08 | 0.015     | -1.579 | 1.80027E-07         | 0.0332                  |

Table S2: Differentially methylated regions

| A. HEART DISEASE             |           |           |       |         |                  |                                                                                                                                                                                                                                                                                                                                             |
|------------------------------|-----------|-----------|-------|---------|------------------|---------------------------------------------------------------------------------------------------------------------------------------------------------------------------------------------------------------------------------------------------------------------------------------------------------------------------------------------|
| Chromosome                   | start     | end       | width | no.cpgs | min smoothed fdr | Overlapping Genes                                                                                                                                                                                                                                                                                                                           |
| chr12                        | 4918335   | 4919081   | 747   | 6       | 1.08E-12         | GALNT8, KCNA6                                                                                                                                                                                                                                                                                                                               |
| B. OUTPATIENT SURGERIES ≥ 10 |           |           |       |         |                  |                                                                                                                                                                                                                                                                                                                                             |
| Chromosome                   | start     | end       | width | no.cpgs | min smoothed fdr | Overlapping Genes                                                                                                                                                                                                                                                                                                                           |
| chr10                        | 127059333 | 127059374 | 42    | 2       | 1.70E-08         | N/A                                                                                                                                                                                                                                                                                                                                         |
| chr1                         | 36787932  | 36788627  | 696   | 5       | 1.30E-09         | snoU13, Y RNA,<br>SCARNA16, SCARNA21,<br>U1, SCARNA17,<br>SCARNA18, SCARNA24,<br>SNORD112, SNORA62,<br>SH3D21, SNORA63,<br>SNORD46, SNORA2,<br>SNORD81, U3,<br>SNORA51, SNORA25,<br>SCARNA20, SNORA67,<br>U6, SNORA70,<br>SNORA77, SNORA26,<br>U8, SCARNA11, EVA1B,<br>SNORA31, SNORA42,<br>SNORA40, SNORD64,<br>ACA64, snoU109,<br>SNORD60 |
| chr14                        | 24780404  | 24780557  | 154   | 4       | 3.89E-07         | LTB4R2, SNORA79,<br>CIDEB                                                                                                                                                                                                                                                                                                                   |

**Table S3: Over represented gene ontology for genes identified via differentially methylated sites and regions**

| Enrichment FDR p-value | Genes in list | Total genes | Functional Category                                                | Genes                |
|------------------------|---------------|-------------|--------------------------------------------------------------------|----------------------|
| 0.00260277             | 4             | 395         | Protein homooligomerization                                        | GLS SKI GALNT8 KCNA6 |
| 0.00479721             | 2             | 39          | Myotube cell development                                           | FAM129B SKI          |
| 0.00479721             | 2             | 35          | Skeletal muscle fiber development                                  | FAM129B SKI          |
| 0.00479721             | 4             | 641         | Protein complex oligomerization                                    | GLS SKI GALNT8 KCNA6 |
| 0.01005811             | 2             | 63          | Positive regulation of DNA binding                                 | FAM129B SKI          |
| 0.01125224             | 2             | 73          | Muscle fiber development                                           | FAM129B SKI          |
| 0.02382091             | 2             | 115         | Myotube differentiation                                            | SKI FAM129B          |
| 0.02738267             | 2             | 132         | Regulation of DNA binding                                          | FAM129B SKI          |
| 0.03104622             | 2             | 152         | Negative regulation of cellular response to growth factor stimulus | SKI FAM129B          |
| 0.03104622             | 2             | 171         | Skeletal muscle tissue development                                 | FAM129B SKI          |
| 0.03104622             | 2             | 178         | Muscle cell development                                            | FAM129B SKI          |
| 0.03104622             | 2             | 164         | Striated muscle cell development                                   | FAM129B SKI          |
| 0.03104622             | 2             | 180         | Skeletal muscle organ development                                  | FAM129B SKI          |
| 0.03172491             | 2             | 189         | Positive regulation of binding                                     | FAM129B SKI          |
| 0.04877586             | 2             | 244         | Potassium ion transport                                            | KCNA6 GALNT8         |

**Table S4: Functional PPI modules****A. HEART DISEASE**

| Symbol (Seed) | Size | Mod   | P     | Genes                                                                                                                                                                                                                                                                        |
|---------------|------|-------|-------|------------------------------------------------------------------------------------------------------------------------------------------------------------------------------------------------------------------------------------------------------------------------------|
| ABCA1         | 43   | 1.262 | 0.001 | ABCA1 ARHGEF11 RAPGEF6 SNTA1 SNTB1 LIN7A LIN7B UTRN ARHGEF12 SNTB2 MPDZ UGP2 AOX1 SPTLC1 ADRA1D MAST1 LPAR1 SPTLC2 MAST2 LPAR2 PTPRN MRAS SNTG1 DTNB DTNA SNTG2 SSPN SYNC SYNM DTNBP1 BLOC1S2 BLOC1S4 BLOC1S1 PTPRT APBA1 CNTNAP4 SNX27 KIF17 MAPK12 ADRA1A NOS1 RASD1 VAC14 |

| EntrezID | Symbol | stat(DNA <sub>m</sub> ) | P(DNA <sub>m</sub> ) | stat(Int) |
|----------|--------|-------------------------|----------------------|-----------|
| 19       | ABCA1  | -2.8                    | 0.006                | 2.8       |
| 6645     | SNTB2  | 2.52                    | 0.013                | 2.52      |

|               |          |       |       |      |
|---------------|----------|-------|-------|------|
| <b>282991</b> | BLOC1S2  | 2.41  | 0.018 | 2.41 |
| <b>64130</b>  | LIN7B    | 2.22  | 0.029 | 2.22 |
| <b>4842</b>   | NOS1     | -1.77 | 0.08  | 1.77 |
| <b>1837</b>   | DTNA     | 1.67  | 0.098 | 1.67 |
| <b>7402</b>   | UTRN     | -1.66 | 0.101 | 1.66 |
| <b>51735</b>  | RAPGEF6  | 1.57  | 0.12  | 1.57 |
| <b>6641</b>   | SNTB1    | 1.55  | 0.123 | 1.55 |
| <b>9826</b>   | ARHGEF11 | 1.46  | 0.149 | 1.46 |
| <b>146</b>    | ADRA1D   | -1.42 | 0.159 | 1.42 |
| <b>9517</b>   | SPTLC2   | 1.34  | 0.182 | 1.34 |
| <b>84062</b>  | DTNBP1   | 1.21  | 0.228 | 1.21 |
| <b>10558</b>  | SPTLC1   | -1.17 | 0.244 | 1.17 |
| <b>81609</b>  | SNX27    | -1.08 | 0.285 | 1.08 |
| <b>85445</b>  | CNTNAP4  | 1.01  | 0.314 | 1.01 |
| <b>7360</b>   | UGP2     | 1     | 0.318 | 1    |
| <b>6300</b>   | MAPK12   | 0.91  | 0.363 | 0.91 |
| <b>8082</b>   | SSPN     | 0.86  | 0.394 | 0.86 |
| <b>1902</b>   | LPAR1    | 0.8   | 0.428 | 0.8  |
| <b>54212</b>  | SNTG1    | 0.77  | 0.446 | 0.77 |
| <b>6640</b>   | SNTA1    | 0.7   | 0.487 | 0.7  |
| <b>55330</b>  | BLOC1S4  | -0.58 | 0.561 | 0.58 |
| <b>23139</b>  | MAST2    | -0.58 | 0.567 | 0.58 |
| <b>22983</b>  | MAST1    | -0.57 | 0.57  | 0.57 |
| <b>5798</b>   | PTPRN    | 0.56  | 0.575 | 0.56 |
| <b>54221</b>  | SNTG2    | 0.53  | 0.594 | 0.53 |
| <b>22808</b>  | MRAS     | -0.53 | 0.596 | 0.53 |
| <b>81493</b>  | SYNC     | -0.53 | 0.598 | 0.53 |
| <b>51655</b>  | RASD1    | 0.5   | 0.619 | 0.5  |
| <b>23365</b>  | ARHGEF12 | 0.48  | 0.629 | 0.48 |
| <b>57576</b>  | KIF17    | -0.45 | 0.654 | 0.45 |
| <b>320</b>    | APBA1    | -0.41 | 0.686 | 0.41 |
| <b>148</b>    | ADRA1A   | 0.3   | 0.767 | 0.3  |
| <b>8825</b>   | LIN7A    | 0.25  | 0.807 | 0.25 |
| <b>2647</b>   | BLOC1S1  | -0.19 | 0.85  | 0.19 |
| <b>55697</b>  | VAC14    | 0.17  | 0.861 | 0.17 |
| <b>316</b>    | AOX1     | -0.16 | 0.87  | 0.16 |
| <b>8777</b>   | MPDZ     | -0.14 | 0.886 | 0.14 |
| <b>11122</b>  | PTPRT    | -0.09 | 0.926 | 0.09 |
| <b>1838</b>   | DTNB     | -0.05 | 0.958 | 0.05 |
| <b>9170</b>   | LPAR2    | 0.04  | 0.972 | 0.04 |
| <b>23336</b>  | SYNM     | 0.03  | 0.977 | 0.03 |

- Highlighted rows in green show significant value of genes that serve as targets in the network.

**B. OUTPATIENT SURGERIES  $\geq$  10**

| Symbol(Seed) | Size | Mod         | P     | Genes                                                                                                                    |
|--------------|------|-------------|-------|--------------------------------------------------------------------------------------------------------------------------|
| EXOSC4       | 17   | 1.299737887 | 0.005 | EXOSC4 AICDA EXOSC2 DCP2 MPHOSPH6 EXOSC9<br>EXOSC3 ZNF598 NEK1 AKR1A1 KHSRP A1CF<br>KNSTRN ARHGAP18 ZNF350 CTNNAL1 THOP1 |

| EntrezID | Symbol   | stat(DNA <sub>m</sub> ) | P(DNA <sub>m</sub> ) | stat(Int) |
|----------|----------|-------------------------|----------------------|-----------|
| 54512    | EXOSC4   | -3.14                   | 0.002                | 3.14      |
| 90850    | ZNF598   | -1.75                   | 0.084                | 1.75      |
| 51010    | EXOSC3   | -1.7                    | 0.092                | 1.7       |
| 23404    | EXOSC2   | -1.22                   | 0.224                | 1.22      |
| 8570     | KHSRP    | -1.07                   | 0.286                | 1.07      |
| 10327    | AKR1A1   | -0.87                   | 0.387                | 0.87      |
| 5393     | EXOSC9   | -0.83                   | 0.411                | 0.83      |
| 4750     | NEK1     | -0.79                   | 0.429                | 0.79      |
| 10200    | MPHOSPH6 | -0.61                   | 0.543                | 0.61      |
| 8727     | CTNNAL1  | -0.61                   | 0.546                | 0.61      |
| 167227   | DCP2     | -0.48                   | 0.63                 | 0.48      |
| 90417    | KNSTRN   | 0.43                    | 0.667                | 0.43      |
| 7064     | THOP1    | -0.38                   | 0.702                | 0.38      |
| 29974    | A1CF     | 0.36                    | 0.718                | 0.36      |
| 93663    | ARHGAP18 | 0.36                    | 0.722                | 0.36      |
| 59348    | ZNF350   | -0.23                   | 0.818                | 0.23      |
| 57379    | AICDA    | 0.07                    | 0.94                 | 0.07      |

**Table S5: Local quantitative trait loci (SNPs) for methylated sites (mQTL)**

| Chr | Position    | rsID        | mSite      | Statistic | P-value  | FDR      | P-value.gc |
|-----|-------------|-------------|------------|-----------|----------|----------|------------|
| 9   | 9:130148962 | rs192528579 | cg06641417 | -16.0471  | 4.09E-24 | 5.50E-20 | 0.04       |
| 9   | 9:130223401 | rs182192023 | cg06641417 | -16.0471  | 4.09E-24 | 5.50E-20 | 0.04       |
| 9   | 9:130225162 | rs114553373 | cg06641417 | -16.0471  | 4.09E-24 | 5.50E-20 | 0.04       |
| 9   | 9:130225427 | rs187644239 | cg06641417 | -16.0471  | 4.09E-24 | 5.50E-20 | 0.04       |
| 9   | 9:130264053 | rs114896522 | cg06641417 | -16.0471  | 4.09E-24 | 5.50E-20 | 0.04       |
| 9   | 9:130286881 | rs139996037 | cg06641417 | -16.0471  | 4.09E-24 | 5.50E-20 | 0.04       |
| 9   | 9:129748363 | rs143219617 | cg06641417 | -9.90637  | 1.53E-14 | 1.12E-10 | 0.20       |
| 9   | 9:129995636 | rs115397220 | cg06641417 | -9.7456   | 2.88E-14 | 2.03E-10 | 0.21       |
| 9   | 9:130013802 | rs140087528 | cg06641417 | -9.7456   | 2.88E-14 | 2.03E-10 | 0.21       |

**Table S6: Epigenetic age**

| Biological Age in Years (mean±SD)                 | 95% CI      | P-value   |
|---------------------------------------------------|-------------|-----------|
| <i>Horvath Epigenetic Clock for Heart Disease</i> |             |           |
| Cases                                             | 56.6 ± 12.9 | 3.8, 23.4 |
| Control                                           | 43 ± 11.7   | 0.007055  |
| <i>Hannum Epigenetic Clock for Heart Disease</i>  |             |           |
| Cases                                             | 45.7 ± 11   | 5.6, 20.9 |
| Controls                                          | 32.5 ± 9.07 | 0.0009115 |

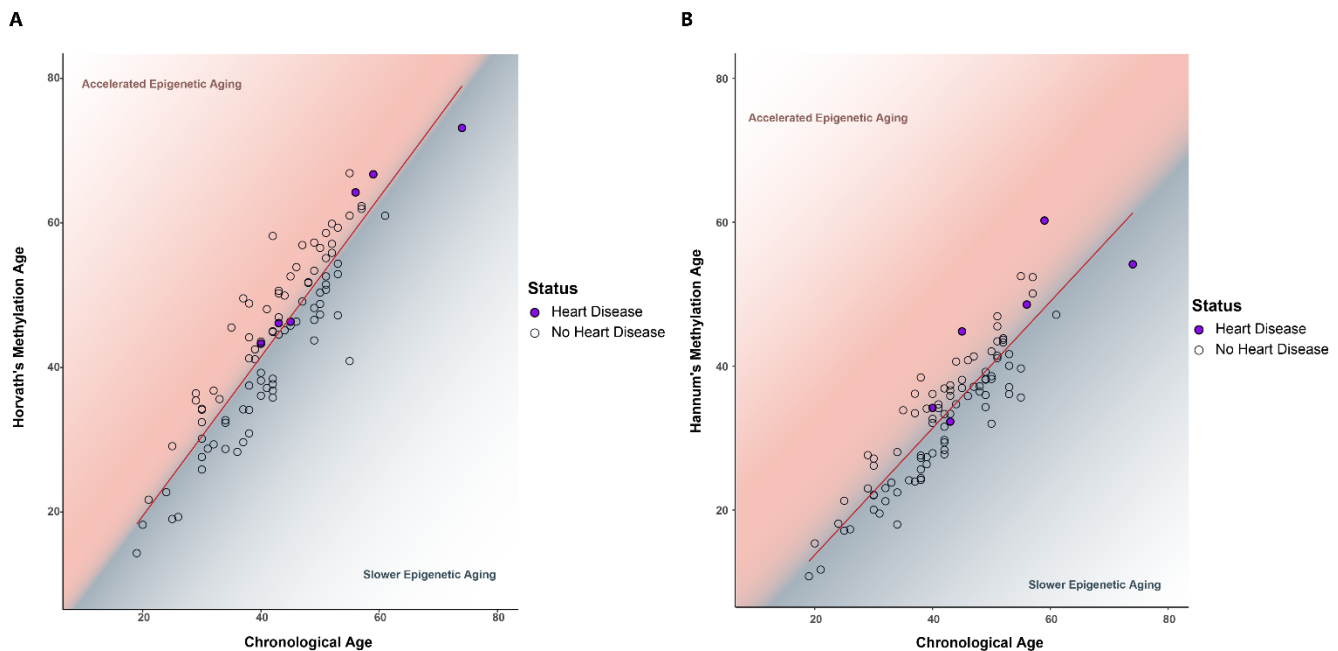

**Table S7: Δ DNAm age (difference in epigenetic and chronological age)**

| Δ DNAm Age in Years (mean±SD)                      | 95% CI       | P-value     |
|----------------------------------------------------|--------------|-------------|
| <i>ΔHorvath Epigenetic Clock for Heart Disease</i> |              |             |
| Cases                                              | 3.81 ± 3.56  | -2.15, 6.65 |
| Control                                            | 1.57 ± 5.34  | 0.31        |
| <i>ΔHannum Epigenetic Clock for Heart Disease</i>  |              |             |
| Cases                                              | -7.12 ± 7.68 | -6.15, 9.92 |
| Controls                                           | -9.00 ± 4.02 | 0.57        |

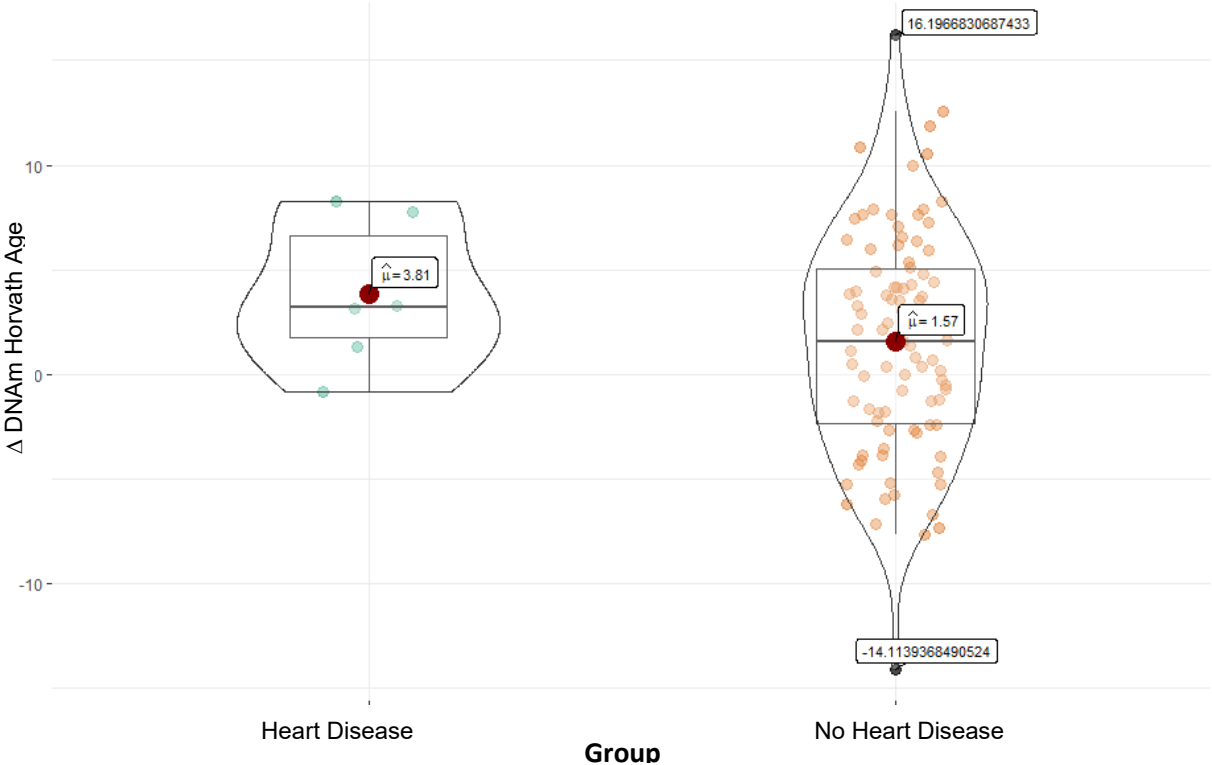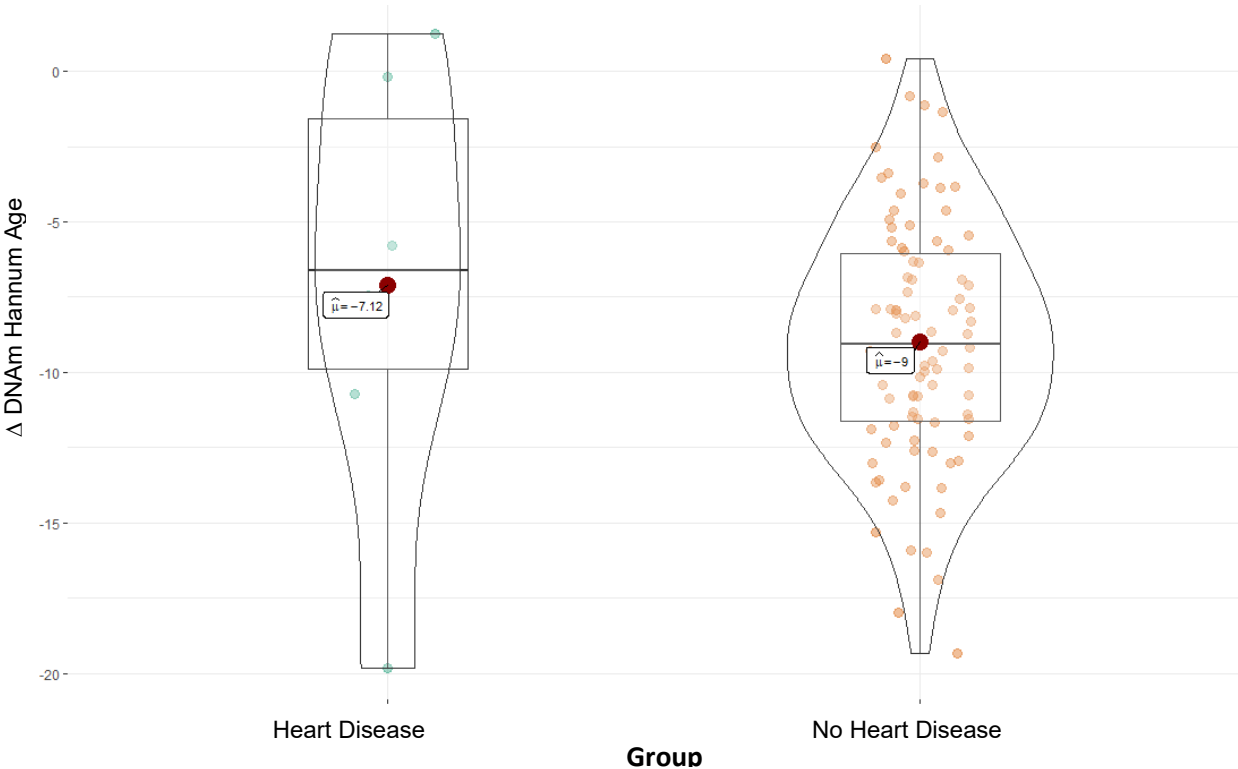

# GeneMANIA report

Created on : 19 February 2020 09:25:42

Last database update : 13 March 2017 00:00:00

Application version : 3.6.0

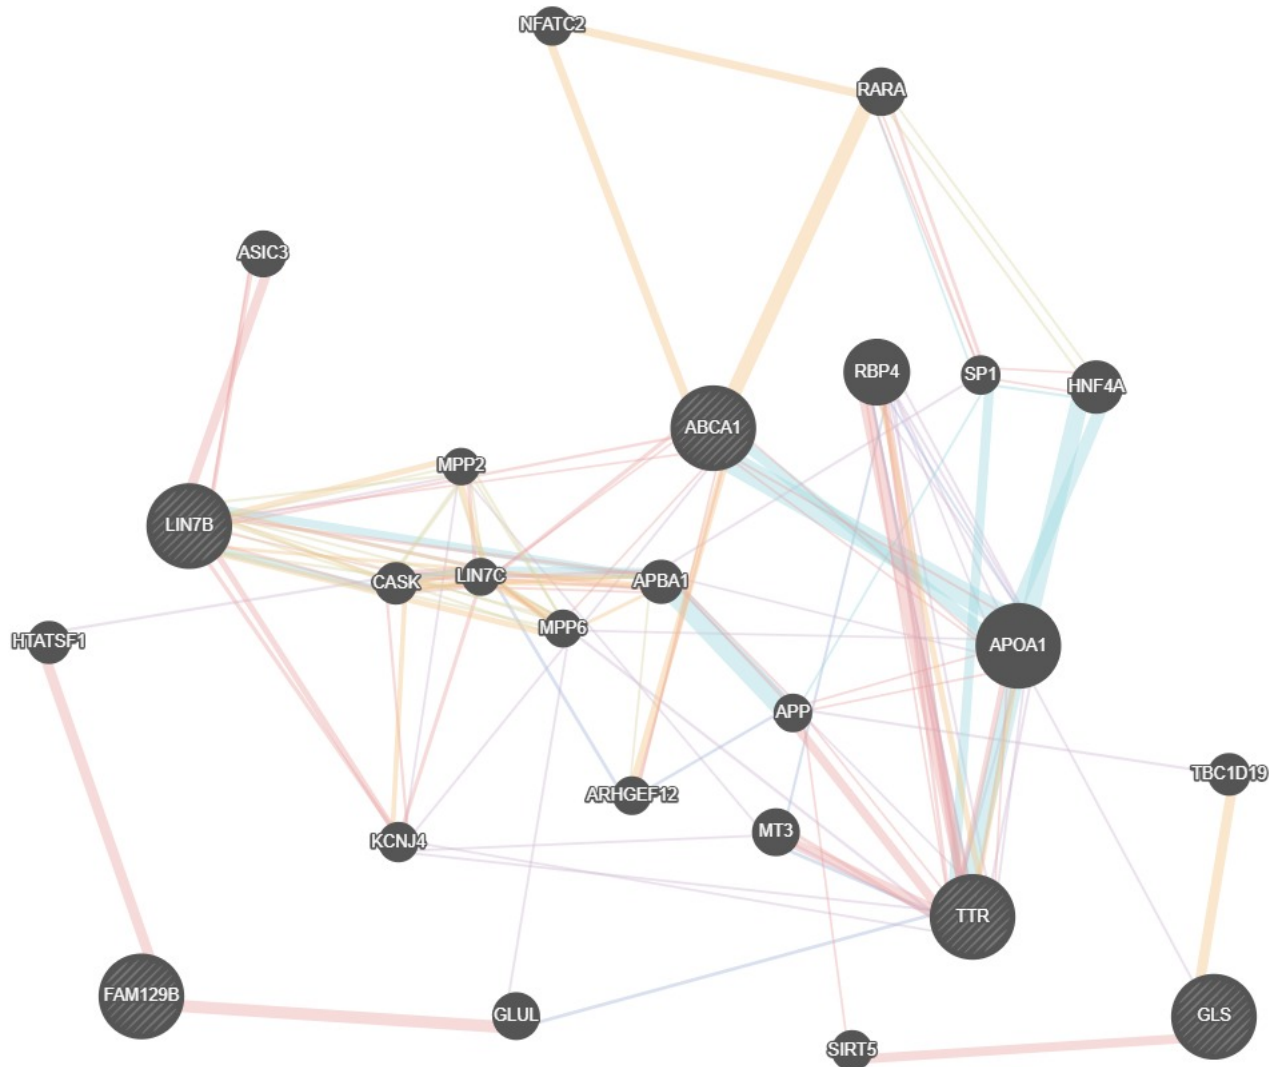

## Networks

- Physical Interactions
- Co-expression
- Predicted
- Co-localization
- Pathway
- Genetic Interactions
- Shared protein domains

## Functions

N/A



# Search parameters

**Organism** Homo sapiens (human)  
**Genes** LIN7B , GLS , TTR , FAM129B , ABCA1  
**Network weighting** Automatically selected weighting method  
**Networks** **A**

---

Abu-Odeh-Aqeilan-2014 , Agrawal-Sedivy-2010 , Aichem-Groettrup-2012 , Albers-Koegl-2005 , Alexandru-Deshaies-2008 , Alizadeh-Staudt-2000 , Andresen-Flores-Morales-2014 , Arbuckle-Grant-2010 , Arroyo-Aloy-2014 , Arroyo-Aloy-2015

## **B**

---

Bahr-Bowler-2013 , Bailey-Hieter-2015 , Bandyopadhyay-Ideker-2010 , Bantscheff-Drewes-2011 , Barr-Knapp-2009 , Barrios-Rodiles-Wrana-2005 , Behrends-Harper-2010 , Behzadnia-Lührmann-2007 , Bennett-Harper-2010 , Benzinger-Hermeking-2005 , Berggård-James-2006 , Bett-Hay-2013 , Bhatnagar-Attie-2014 , Bild-Nevins-2006 B , BIOGRID-SMALL-SCALE-STUDIES , BIOGRID-SMALL-SCALE-STUDIES , Blandin-Richard-2013 , Blomen-Brummelkamp-2015 , Blomen-Brummelkamp-2015 , Bogachek-Weigel-2014 , Boldrick-Relman-2002 , Bonacci-Soubeyran-2014 , Bouwmeester-Supert-Furga-2004 , Brajenovic-Drewes-2004 , Brehme-Supert-Furga-2009 , Bruderer-Hay-2011 , Burington-Shaughnessy-2008 , Butland-Hayden-2014 , Byron-Humphries-2012

## **C**

---

Cai-Conaway-2007 , Camargo-Brandon-2007 , Campos-Reinberg-2015 , Cao-Chinnaiyan-2014 , Carmon-Liu-2014 , CELL\_MAP , Chen-Brown-2002 , Chen-Ge-2013 , Chen-Huang-2014 , Chen-Zhang-2013 , Christianson-Kopito-2011 , Cloutier-Coulombe-2013 , Colland-Gauthier-2004 , Corominas-Iakoucheva-2014 , Couzens-Gingras-2013 , Cox-Rizzino-2013 , Coyaud-Raught-2015

## **D**

---

Danielsen-Nielsen-2011 , Dart-Wells-2015 , de Hoog-Mann-2004 , Diner-Cristea-2015 , Dobbin-Giordano-2005 , Drissi-Boisvert-2015 , Dyer-Sobral-2010

## **E**

---

Emanuele-Elledge-2011 , Emdal-Olsen-2015 , Ewing-Figeys-2007

## **F**

---

Fenner-Prehn-2010 , Floyd-Pagliarini-2016 , Foerster-Ritter-2013 , Fogeron-Lange-2013 , Foster-Marshall-2013 , Freibaum-Taylor-2010

## **G**

---

Gabriel-Baumgrass-2016 , Galligan-Howley-2015 , Gao-Reinberg-2012 , Gautier-Hall-2009 , Giannone-Liu-2010 , Glatter-Gstaiger-2009 , Gloeckner-Ueffing-2007 ,

## G

---

Goehler-Wanker-2004 , Golebiowski-Hay-2009 , Goudreault-Gingras-2009 , Grant-2010 , Greco-Cristea-2011 , Grossmann-Stelzl-2015 , Guarani-Harper-2014 , Gupta-Pelletier-2015

## H

---

Hanson-Clayton-2014 , Hauri-Gstaiger-2013 , Havrylov-Redowicz-2009 , Havugimana-Emili-2012 , Hayes-Urbé-2012 , Hegele-Stelzl-2012 A , Hegele-Stelzl-2012 B , Hein-Mann-2015 , Hill-Livingston-2014 , HUMANCYC , Humphries-Humphries-2009 , Hutchins-Peters-2010 , Huttlin-Gygi-2015

## I

---

I2D-BIND-Fly2Human , I2D-BIND-Mouse2Human , I2D-BIND-Rat2Human , I2D-BIND-Worm2Human , I2D-BIND-Yeast2Human , I2D-BioGRID-Fly2Human , I2D-BioGRID-Mouse2Human , I2D-BioGRID-Rat2Human , I2D-BioGRID-Worm2Human , I2D-BioGRID-Yeast2Human , I2D-Chen-Pawson-2009-PiwiScreen-Mouse2Human , I2D-Formstecher-Daviet-2005-Embryo-Fly2Human , I2D-Giot-Rothbert-2003-Low-Fly2Human , I2D-INNATEDB-Mouse2Human , I2D-IntAct-Fly2Human , I2D-IntAct-Mouse2Human , I2D-IntAct-Rat2Human , I2D-IntAct-Worm2Human , I2D-IntAct-Yeast2Human , I2D-Krogan-Greenblatt-2006-Core-Yeast2Human , I2D-Krogan-Greenblatt-2006-NonCore-Yeast2Human , I2D-Li-Vidal-2004-CORE-1-Worm2Human , I2D-Li-Vidal-2004-non-core-Worm2Human , I2D-Manual-Mouse2Human , I2D-Manual-Rat2Human , I2D-MGI-Mouse2Human , I2D-MINT-Fly2Human , I2D-MINT-Mouse2Human , I2D-MINT-Rat2Human , I2D-MINT-Worm2Human , I2D-MINT-Yeast2Human , I2D-Ptacek-Snyder-2005-Yeast2Human , I2D-Tarassov-PCA-Yeast2Human , I2D-Tewari-Vidal-2004-TGFb-Worm2Human , I2D-vonMering-Bork-2002-High-Yeast2Human , I2D-vonMering-Bork-2002-Low-Yeast2Human , I2D-vonMering-Bork-2002-Medium-Yeast2Human , I2D-Wang-Orkin-2006-EScmplx-Mouse2Human , I2D-Wang-Orkin-2006-EScmplxlow-Mouse2Human , I2D-Yu-Vidal-2008-GoldStd-Yeast2Human , IMID , Ingham-Pawson-2005 , Innocenti-Brown-2011 , INTERPRO , IREF-BIND , IREF-BIOGRID , IREF-DIP , IREF-HPRD , IREF-INTACT , IREF-MATRIXDB , IREF-MPPI , IREF-PUBMED , IREF-SMALL-SCALE-STUDIES , IREF-SMALL-SCALE-STUDIES

## J

---

Jeronimo-Coulombe-2007 , Jin-Pawson-2004 , Johnson-Kerner-Wichterle-2015 , Johnson-Shoemaker-2003 , Jones-MacBeath-2006 , Joshi-Cristea-2013 , Jäger-Krogan-2011

## K

---

Kahle-Zoghbi-2011 , Kaltenbach-Hughes-2007 , Katsogiannou-Rocchi-2014 , Kim-Gygi-2011 , Kim-Major-2015 , Kneissl-Grummt-2003 , Koch-Hermeking-2007 , Kotlyar-Jurisica-2015 , Kristensen-Foster-2012 , Kärblane-Sarmiento-2015 , Kırılı-Görlich-2015

## L

---

Lambert-Gingras-2015 , Lamoliatte-Thibault-2014 , Lau-Ronai-2012 , Lee-Songyang-2011 , Lehner-Sanderson-2004 A , Lehner-Sanderson-2004 B , Leng-Wang-2014 , Leung-Jones-2014 , Li-Chen-2015 , Li-Dorf-2011 A , Li-Dorf-2011 B , Li-Dorf-2014 , Li-Haura-2013 , Lim-Zoghbi-2006 , Lin-Smith-2010 , Lipp-Guthrie-2015 , Liu-Wang-2012 , Llères-Lamond-2010 , Loch-Strickler-2012 , Low-Heck-2014 , Lu-Zhang-2013 , Luo-Elledge-2009

## M

---

Mak-Moffat-2010 , Mallon-McKay-2013 , Malovannaya-Qin-2010 , Markson-Sanderson-2009 , Maréchal-Zou-2014 , Matsumoto-Nakayama-2005 , McCracken-Blencowe-2005 , McFarland-Nussbaum-2008 , Meek-Piwnica-Worms-2004 , Milev-Mouland-2012 , Miyamoto-Sato-Yanagawa-2010 , Murakawa-Landthaler-2015

## N

---

Nakayama-Ohara-2002 , Nakayasu-Adkins-2013 , Napolitano-Meroni-2011 , Narayan-Bennett-2012 , Nathan-Goldberg-2013 , NCI\_NATURE , Neganova-Lako-2011 , Newman-Keating-2003 , Nicholson-Hupp-2014 , Noble-Diehl-2008

## O

---

Oliviero-Cagney-2015 , Olma-Pintard-2009 , Oláh-Ovádi-2011 , Oshikawa-Nakayama-2012 , Ouyang-Gill-2009

## P

---

Panigrahi-Pati-2012 , Papp-Lamia-2015 , Perez-Hernandez-Yáñez-Mó-2013 , Perou-Botstein-1999 , Perou-Botstein-2000 , Persaud-Rotin-2009 , Petschnigg-Stagljar-2014 , PFAM , Phillips-Corn-2013 , Pichlmair-Supert-Furga-2011 , Pichlmair-Supert-Furga-2012 , Pilot-Storck-Goillot-2010 , Povlsen-Choudhary-2012

## R

---

Ramachandran-LaBaer-2004 , Raman-Harper-2015 , Ramaswamy-Golub-2001 , Ravasi-Hayashizaki-2010 , REACTOME , Reinke-Keating-2013 , Reyniers-Taymans-2014 , Richter-Chrzanowska-Lightowers-2010 , Rieger-Chu-2004 , Rolland-Vidal-2014 , Rosenwald-Staudt-2001 , Roth-Zlotnik-2006 , Roux-Burke-2012 , Rowbotham-Mermoud-2011 , Roy-Pardo-2014 , Roy-Parent-2013 , Rual-Vidal-2005 A , Rual-Vidal-2005 B

## S

---

Sang-Jackson-2011 , Sato-Conaway-2004 , Schadt-Shoemaker-2004 , Scholz-Taylor-2016 , Singh-Moore-2012 , Smirnov-Cheung-2009 , So-Colwill-2015 , Soler-López-Aloy-2011 , Sowa-Harper-2009 , Stehling-Lill-2012 , Stehling-Lill-2013 , Stelzl-Wanker-2005 , Stes-Gevaert-2014 , Stuart-Kim-2003 , Suter-Wanker-2013

## T

---

Taipale-Lindquist-2012 , Taipale-Lindquist-2014 , Takahashi-Conaway-2011 , Tarallo-Weisz-2011 , Tatham-Hay-2011 , Teixeira-Gomes-2010 , Thalappilly-

## **T**

---

Dusetti-2008 , Thompson-Luchansky-2014 , Tong-Moran-2014 , Toyoshima-Grandori-2012 , Tsai-Cristea-2012

## **U**

---

Udeshi-Carr-2012

## **V**

---

van Wijk-Timmers-2009 , Vandamme-Angrand-2011 , Varjosalo-Gstaiger-2013 , Varjosalo-Supertti-Furga-2013 , Venkatesan-Vidal-2009 , Vermeulen-Mann-2010 , Vinayagam-Wanker-2011 , Virok-Fülöp-2011 , Vizeacoumar-Moffat-2013

## **W**

---

Wagner-Choudhary-2011 , Wallach-Kramer-2013 , Wan-Emili-2015 , Wang-Balch-2006 , Wang-Cheung-2015 , Wang-He-2008 , Wang-Maris-2006 , Wang-Xu-2015 , Wang-Yang-2011 , Weimann-Stelzl-2013 A , Weimann-Stelzl-2013 B , Weinmann-Meister-2009 , Wen-Wu-2014 , Whisenant-Salomon-2015 , Wilker-Yaffe-2007 , Willingham-Muchowski-2003 , Witt-Labeit-2008 , Wong-O'Bryan-2012 , Woods-Monteiro-2012 , Woodsmith-Sanderson-2012 , Wu-Garvey-2007 , Wu-Li-2007 , Wu-Ma-2012 , Wu-Stein-2010 , Wu-Stein-2010

## **X**

---

Xiao-Lefkowitz-2007 , Xie-Cong-2013 , Xie-Green-2012 , Xu-Ye-2012

## **Y**

---

Yang-Chen-2010 , Yatim-Benkirane-2012 , Yu-Chow-2013 , Yu-Vidal-2011

## **Z**

---

Zanon-Pichler-2013 , Zhang-Shang-2006 , Zhang-Zou-2011 , Zhao-Krug-2005 , Zhao-Yang-2011 , Zhou-Conrads-2004 , Zhou-Hanemann-2016

# Genes

| <b>Gene</b> | <b>Description</b>                                                                          | <b>Rank</b> |
|-------------|---------------------------------------------------------------------------------------------|-------------|
| FAM129B     | family with sequence similarity 129 member B [Source:HGNC Symbol; Acc:HGNC:25282]           | N/A         |
| LIN7B       | lin-7 homolog B, crumbs cell polarity complex component [Source:HGNC Symbol;Acc:HGNC:17788] | N/A         |
| ABCA1       | ATP binding cassette subfamily A member 1 [Source:HGNC Symbol; Acc:HGNC:29]                 | N/A         |
| GLS         | glutaminase [Source:HGNC Symbol;Acc:HGNC:4331]                                              | N/A         |
| TTR         | transthyretin [Source:HGNC Symbol;Acc:HGNC:12405]                                           | N/A         |
| APOA1       | apolipoprotein A1 [Source:HGNC Symbol;Acc:HGNC:600]                                         | 1           |
| RBP4        | retinol binding protein 4 [Source:HGNC Symbol;Acc:HGNC:9922]                                | 2           |
| HNF4A       | hepatocyte nuclear factor 4 alpha [Source:HGNC Symbol;Acc:HGNC:5024]                        | 3           |
| RARA        | retinoic acid receptor alpha [Source:HGNC Symbol;Acc:HGNC:9864]                             | 4           |
| MT3         | metallothionein 3 [Source:HGNC Symbol;Acc:HGNC:7408]                                        | 5           |
| GLUL        | glutamate-ammonia ligase [Source:HGNC Symbol;Acc:HGNC:4341]                                 | 6           |
| ASIC3       | acid sensing ion channel subunit 3 [Source:HGNC Symbol;Acc:HGNC:101]                        | 7           |
| APBA1       | amyloid beta precursor protein binding family A member 1 [Source:HGNC Symbol;Acc:HGNC:578]  | 8           |
| HTATSF1     | HIV-1 Tat specific factor 1 [Source:HGNC Symbol;Acc:HGNC:5276]                              | 9           |
| TBC1D19     | TBC1 domain family member 19 [Source:HGNC Symbol;Acc:HGNC:25624]                            | 10          |
| CASK        | calcium/calmodulin dependent serine protein kinase [Source:HGNC Symbol;Acc:HGNC:1497]       | 11          |
| SIRT5       | sirtuin 5 [Source:HGNC Symbol;Acc:HGNC:14933]                                               | 12          |
| KCNJ4       | potassium voltage-gated channel subfamily J member 4 [Source:HGNC Symbol;Acc:HGNC:6265]     | 13          |
| SP1         | Sp1 transcription factor [Source:HGNC Symbol;Acc:HGNC:11205]                                | 14          |
| NFATC2      | nuclear factor of activated T-cells 2 [Source:HGNC Symbol;Acc:HGNC:7776]                    | 15          |
| ARHGEF12    | Rho guanine nucleotide exchange factor 12 [Source:HGNC Symbol;Acc:HGNC:14193]               | 16          |
| APP         | amyloid beta precursor protein [Source:HGNC Symbol;Acc:HGNC:620]                            | 17          |

| <b>Gene</b> | <b>Description</b>                                                                          | <b>Rank</b> |
|-------------|---------------------------------------------------------------------------------------------|-------------|
| MPP6        | membrane palmitoylated protein 6 [Source:HGNC Symbol;Acc:HGNC:18167]                        | 18          |
| LIN7C       | lin-7 homolog C, crumbs cell polarity complex component [Source:HGNC Symbol;Acc:HGNC:17789] | 19          |
| MPP2        | membrane palmitoylated protein 2 [Source:HGNC Symbol;Acc:HGNC:7220]                         | 20          |

# Networks

| <b>Physical Interactions</b>                                                                                                                                                                                                                                                        | <b>67.64%</b> |
|-------------------------------------------------------------------------------------------------------------------------------------------------------------------------------------------------------------------------------------------------------------------------------------|---------------|
| <b>Matsumoto-Nakayama-2005</b>                                                                                                                                                                                                                                                      | <b>5.54%</b>  |
| Large-scale analysis of the human ubiquitin-related proteome. Matsumoto et al (2005). <i>Proteomics</i><br>Physical Interactions with 311 interactions from BioGRID                                                                                                                 |               |
| <b>Singh-Moore-2012</b>                                                                                                                                                                                                                                                             | <b>4.12%</b>  |
| The cellular EJC interactome reveals higher-order mRNP structure and an EJC-SR protein nexus. Singh et al (2012). <i>Cell</i><br>Physical Interactions with 301 interactions from iRefIndex                                                                                         |               |
| <b>Petschnigg-Stagljar-2014</b>                                                                                                                                                                                                                                                     | <b>3.90%</b>  |
| The mammalian-membrane two-hybrid assay (MaMTH) for probing membrane-protein interactions in human cells. Petschnigg et al (2014). <i>Nat Methods</i><br>Physical Interactions with 122 interactions from BioGRID                                                                   |               |
| <b>Whisenant-Salomon-2015</b>                                                                                                                                                                                                                                                       | <b>2.70%</b>  |
| The Activation-Induced Assembly of an RNA/Protein Interactome Centered on the Splicing Factor U2AF2 Regulates Gene Expression in Human CD4 T Cells. Whisenant et al (2015). <i>PLoS One</i><br>Physical Interactions with 237 interactions from BioGRID                             |               |
| <b>Lu-Zhang-2013</b>                                                                                                                                                                                                                                                                | <b>2.43%</b>  |
| The HECT type ubiquitin ligase NEDL2 is degraded by anaphase-promoting complex/cyclosome (APC/C)-Cdh1, and its tight regulation maintains the metaphase to anaphase transition. Lu et al (2013). <i>J Biol Chem</i><br>Physical Interactions with 281 interactions from iRefIndex   |               |
| <b>Phillips-Corn-2013</b>                                                                                                                                                                                                                                                           | <b>1.88%</b>  |
| Conformational dynamics control ubiquitin-deubiquitinase interactions and influence in vivo signaling. Phillips et al (2013). <i>Proc Natl Acad Sci U S A</i><br>Physical Interactions with 134 interactions from BioGRID                                                           |               |
| <b>Wagner-Choudhary-2011</b>                                                                                                                                                                                                                                                        | <b>1.86%</b>  |
| A proteome-wide, quantitative survey of in vivo ubiquitylation sites reveals widespread regulatory roles. Wagner et al (2011). <i>Mol Cell Proteomics</i><br>Physical Interactions with 1,158 interactions from iRefIndex                                                           |               |
| <b>Behzadnia-Lührmann-2007</b>                                                                                                                                                                                                                                                      | <b>1.55%</b>  |
| Composition and three-dimensional EM structure of double affinity-purified, human prespliceosomal A complexes. Behzadnia et al (2007). <i>EMBO J</i><br>Physical Interactions with 112 interactions from iRefIndex                                                                  |               |
| <b>Leung-Jones-2014</b>                                                                                                                                                                                                                                                             | <b>1.43%</b>  |
| Enhanced prediction of Src homology 2 (SH2) domain binding potentials using a fluorescence polarization-derived c-Met, c-Kit, ErbB, and androgen receptor interactome. Leung et al (2014). <i>Mol Cell Proteomics</i><br>Physical Interactions with 190 interactions from iRefIndex |               |
| <b>Maréchal-Zou-2014</b>                                                                                                                                                                                                                                                            | <b>1.41%</b>  |
| PRP19 transforms into a sensor of RPA-ssDNA after DNA damage and drives ATR activation via a ubiquitin-mediated circuitry. Maréchal et al (2014). <i>Mol Cell</i><br>Physical Interactions with 976 interactions from iRefIndex                                                     |               |
| <b>Berggård-James-2006</b>                                                                                                                                                                                                                                                          | <b>1.40%</b>  |

**Berggård-James-2006**

140 mouse brain proteins identified by Ca<sup>2+</sup>-calmodulin affinity chromatography and tandem mass spectrometry. Berggård et al (2006). *J Proteome Res*

Physical Interactions with 152 interactions from iRefIndex

**Neganova-Lako-2011**

1.28%

An important role for CDK2 in G1 to S checkpoint activation and DNA damage response in human embryonic stem cells. Neganova et al (2011). *Stem Cells*

Physical Interactions with 393 interactions from iRefIndex

**McCracken-Blencowe-2005**

1.21%

Proteomic analysis of SRm160-containing complexes reveals a conserved association with cohesin. McCracken et al (2005). *J Biol Chem*

Physical Interactions with 184 interactions from iRefIndex

**Mak-Moffat-2010**

1.16%

A lentiviral functional proteomics approach identifies chromatin remodeling complexes important for the induction of pluripotency. Mak et al (2010). *Mol Cell Proteomics*

Physical Interactions with 110 interactions from BioGRID

**Murakawa-Landthaler-2015**

1.03%

RC3H1 post-transcriptionally regulates A20 mRNA and modulates the activity of the IKK/NF- $\kappa$ B pathway. Murakawa et al (2015). *Nat Commun*

Physical Interactions with 155 interactions from BioGRID

**Llères-Lamond-2010**

1.00%

Direct interaction between hnRNP-M and CDC5L/PLRG1 proteins affects alternative splice site choice. Llères et al (2010). *EMBO Rep*

Physical Interactions with 848 interactions from BioGRID

**Nicholson-Hupp-2014**

0.99%

A systems wide mass spectrometric based linear motif screen to identify dominant in-vivo interacting proteins for the ubiquitin ligase MDM2. Nicholson et al (2014). *Cell Signal*

Physical Interactions with 382 interactions from iRefIndex

**Jones-MacBeath-2006**

0.93%

A quantitative protein interaction network for the ErbB receptors using protein microarrays. Jones et al (2006). *Nature*

Physical Interactions with 151 interactions from iRefIndex

**McFarland-Nussbaum-2008**

0.87%

Proteomics analysis identifies phosphorylation-dependent alpha-synuclein protein interactions. McFarland et al (2008). *Mol Cell Proteomics*

Physical Interactions with 157 interactions from iRefIndex

**Guarani-Harper-2014**

0.83%

TIMMDC1/C3orf1 functions as a membrane-embedded mitochondrial complex I assembly factor through association with the MC1A complex. Guarani et al (2014). *Mol Cell Biol*

Physical Interactions with 323 interactions from BioGRID

**Hill-Livingston-2014**

0.83%

Systematic screening reveals a role for BRCA1 in the response to transcription-associated DNA damage. Hill et al (2014). *Genes Dev*

Physical Interactions with 125 interactions from iRefIndex



| <b>Physical Interactions</b>                                                                                                                                                        | <b>67.64%</b> |
|-------------------------------------------------------------------------------------------------------------------------------------------------------------------------------------|---------------|
| <b>Bett-Hay-2013</b>                                                                                                                                                                | <b>0.79%</b>  |
| The P-body component USP52/PAN2 is a novel regulator of HIF1A mRNA stability. Bett et al (2013). <i>Biochem J</i>                                                                   |               |
| Physical Interactions with 319 interactions from iRefIndex                                                                                                                          |               |
| <b>Stes-Gevaert-2014</b>                                                                                                                                                            | <b>0.73%</b>  |
| A COFRADIC protocol to study protein ubiquitination. Stes et al (2014). <i>J Proteome Res</i>                                                                                       |               |
| Physical Interactions with 1,327 interactions from iRefIndex                                                                                                                        |               |
| <b>Danielsen-Nielsen-2011</b>                                                                                                                                                       | <b>0.67%</b>  |
| Mass spectrometric analysis of lysine ubiquitylation reveals promiscuity at site level. Danielsen et al (2011). <i>Mol Cell Proteomics</i>                                          |               |
| Physical Interactions with 2,479 interactions from iRefIndex                                                                                                                        |               |
| <b>Jeronimo-Coulombe-2007</b>                                                                                                                                                       | <b>0.65%</b>  |
| Systematic analysis of the protein interaction network for the human transcription machinery reveals the identity of the 7SK capping enzyme. Jeronimo et al (2007). <i>Mol Cell</i> |               |
| Physical Interactions with 699 interactions from BioGRID                                                                                                                            |               |
| <b>Xu-Ye-2012</b>                                                                                                                                                                   | <b>0.65%</b>  |
| SGTA recognizes a noncanonical ubiquitin-like domain in the Bag6-Ubl4A-Trc35 complex to promote endoplasmic reticulum-associated degradation. Xu et al (2012). <i>Cell Rep</i>      |               |
| Physical Interactions with 225 interactions from iRefIndex                                                                                                                          |               |
| <b>Gloeckner-Ueffing-2007</b>                                                                                                                                                       | <b>0.62%</b>  |
| A novel tandem affinity purification strategy for the efficient isolation and characterisation of native protein complexes. Gloeckner et al (2007). <i>Proteomics</i>               |               |
| Physical Interactions with 100 interactions from BioGRID                                                                                                                            |               |
| <b>Fogeron-Lange-2013</b>                                                                                                                                                           | <b>0.61%</b>  |
| LGALS3BP regulates centriole biogenesis and centrosome hypertrophy in cancer cells. Fogeron et al (2013). <i>Nat Commun</i>                                                         |               |
| Physical Interactions with 1,492 interactions from BioGRID                                                                                                                          |               |
| <b>Freibaum-Taylor-2010</b>                                                                                                                                                         | <b>0.60%</b>  |
| Global analysis of TDP-43 interacting proteins reveals strong association with RNA splicing and translation machinery. Freibaum et al (2010). <i>J Proteome Res</i>                 |               |
| Physical Interactions with 216 interactions from iRefIndex                                                                                                                          |               |
| <b>Zhou-Conrads-2004</b>                                                                                                                                                            | <b>0.59%</b>  |
| "An investigation into the human serum "interactome"." Zhou et al (2004). <i>Electrophoresis</i>                                                                                    |               |
| Physical Interactions with 158 interactions from iRefIndex                                                                                                                          |               |
| <b>Brehme-Supertti-Furga-2009</b>                                                                                                                                                   | <b>0.59%</b>  |
| Charting the molecular network of the drug target Bcr-Abl. Brehme et al (2009). <i>Proc Natl Acad Sci U S A</i>                                                                     |               |
| Physical Interactions with 578 interactions from iRefIndex                                                                                                                          |               |
| <b>Yu-Chow-2013</b>                                                                                                                                                                 | <b>0.59%</b>  |
| VCP phosphorylation-dependent interaction partners prevent apoptosis in Helicobacter pylori-infected gastric epithelial cells. Yu et al (2013). <i>PLoS One</i>                     |               |
| Physical Interactions with 272 interactions from iRefIndex                                                                                                                          |               |
| <b>Hegele-Stelzl-2012 B</b>                                                                                                                                                         | <b>0.55%</b>  |
| Dynamic protein-protein interaction wiring of the human spliceosome. Hegele et al (2012). <i>Mol Cell</i>                                                                           |               |
| Physical Interactions with 600 interactions from BioGRID                                                                                                                            |               |

|                                                                                                                                                                                                                                            |               |
|--------------------------------------------------------------------------------------------------------------------------------------------------------------------------------------------------------------------------------------------|---------------|
| <b>Physical Interactions</b>                                                                                                                                                                                                               | <b>67.64%</b> |
| <b>Weinmann-Meister-2009</b>                                                                                                                                                                                                               | <b>0.54%</b>  |
| Importin 8 is a gene silencing factor that targets argonaute proteins to distinct mRNAs. Weinmann et al (2009). <i>Cell</i><br>Physical Interactions with 96 interactions from BioGRID                                                     |               |
| <b>Narayan-Bennett-2012</b>                                                                                                                                                                                                                | <b>0.53%</b>  |
| Short-chain 3-hydroxyacyl-coenzyme A dehydrogenase associates with a protein super-complex integrating multiple metabolic pathways. Narayan et al (2012). <i>PLoS One</i><br>Physical Interactions with 110 interactions from BioGRID      |               |
| <b>Udeshi-Carr-2012</b>                                                                                                                                                                                                                    | <b>0.52%</b>  |
| Methods for quantification of in vivo changes in protein ubiquitination following proteasome and deubiquitinase inhibition. Udeshi et al (2012). <i>Mol Cell Proteomics</i><br>Physical Interactions with 554 interactions from iRefIndex  |               |
| <b>Kristensen-Foster-2012</b>                                                                                                                                                                                                              | <b>0.51%</b>  |
| A high-throughput approach for measuring temporal changes in the interactome. Kristensen et al (2012). <i>Nat Methods</i><br>Physical Interactions with 7,115 interactions from BioGRID                                                    |               |
| <b>Agrawal-Sedivy-2010</b>                                                                                                                                                                                                                 | <b>0.50%</b>  |
| Proteomic profiling of Myc-associated proteins. Agrawal et al (2010). <i>Cell Cycle</i><br>Physical Interactions with 104 interactions from iRefIndex                                                                                      |               |
| <b>Varjosalo-Superti-Furga-2013</b>                                                                                                                                                                                                        | <b>0.49%</b>  |
| Interlaboratory reproducibility of large-scale human protein-complex analysis by standardized AP-MS. Varjosalo et al (2013). <i>Nat Methods</i><br>Physical Interactions with 483 interactions from BioGRID                                |               |
| <b>Rowbotham-Mermoud-2011</b>                                                                                                                                                                                                              | <b>0.46%</b>  |
| Maintenance of silent chromatin through replication requires SWI/SNF-like chromatin remodeler SMARCAD1. Rowbotham et al (2011). <i>Mol Cell</i><br>Physical Interactions with 114 interactions from iRefIndex                              |               |
| <b>Arroyo-Aloy-2014</b>                                                                                                                                                                                                                    | <b>0.44%</b>  |
| Charting the molecular links between driver and susceptibility genes in colorectal cancer. Arroyo et al (2014). <i>Biochem Biophys Res Commun</i><br>Physical Interactions with 598 interactions from iRefIndex                            |               |
| <b>Barr-Knapp-2009</b>                                                                                                                                                                                                                     | <b>0.43%</b>  |
| Large-scale structural analysis of the classical human protein tyrosine phosphatome. Barr et al (2009). <i>Cell</i><br>Physical Interactions with 164 interactions from iRefIndex                                                          |               |
| <b>Emdal-Olsen-2015</b>                                                                                                                                                                                                                    | <b>0.41%</b>  |
| Temporal proteomics of NGF-TrkA signaling identifies an inhibitory role for the E3 ligase Cbl-b in neuroblastoma cell differentiation. Emdal et al (2015). <i>Sci Signal</i><br>Physical Interactions with 1,919 interactions from BioGRID |               |
| <b>Cox-Rizzino-2013</b>                                                                                                                                                                                                                    | <b>0.40%</b>  |
| The SOX2-interactome in brain cancer cells identifies the requirement of MSI2 and USP9X for the growth of brain tumor cells. Cox et al (2013). <i>PLoS One</i><br>Physical Interactions with 280 interactions from iRefIndex               |               |
| <b>Giannone-Liu-2010</b>                                                                                                                                                                                                                   | <b>0.39%</b>  |

---

**Giannone-Liu-2010**

The protein network surrounding the human telomere repeat binding factors TRF1, TRF2, and POT1. Giannone et al (2010). *PLoS One*

Physical Interactions with 279 interactions from iRefIndex

---

**Havugimana-Emili-2012**

0.39%

A census of human soluble protein complexes. Havugimana et al (2012). *Cell*

Physical Interactions with 13,716 interactions from BioGRID

---

**IREF-DIP**

0.39%

Physical Interactions with 4,470 interactions from iRefIndex

---

**Li-Dorf-2011 A**

0.39%

Mapping a dynamic innate immunity protein interaction network regulating type I interferon production. Li et al (2011). *Immunity*

Physical Interactions with 400 interactions from BioGRID

---

**Persaud-Rotin-2009**

0.38%

Comparison of substrate specificity of the ubiquitin ligases Nedd4 and Nedd4-2 using proteome arrays. Persaud et al (2009). *Mol Syst Biol*

Physical Interactions with 239 interactions from iRefIndex

---

**Foerster-Ritter-2013**

0.37%

Characterization of the EGFR interactome reveals associated protein complex networks and intracellular receptor dynamics. Foerster et al (2013). *Proteomics*

Physical Interactions with 159 interactions from iRefIndex

---

**Zhao-Krug-2005**

0.36%

Human ISG15 conjugation targets both IFN-induced and constitutively expressed proteins functioning in diverse cellular pathways. Zhao et al (2005). *Proc Natl Acad Sci U S A*

Physical Interactions with 150 interactions from iRefIndex

---

**Wan-Emili-2015**

0.36%

Panorama of ancient metazoan macromolecular complexes. Wan et al (2015). *Nature*

Physical Interactions with 16,682 interactions from BioGRID

---

**Fenner-Prehn-2010**

0.36%

Expanding the substantial interactome of NEMO using protein microarrays. Fenner et al (2010). *PLoS One*

Physical Interactions with 103 interactions from iRefIndex

---

**Roux-Burke-2012**

0.35%

A promiscuous biotin ligase fusion protein identifies proximal and interacting proteins in mammalian cells. Roux et al (2012). *J Cell Biol*

Physical Interactions with 115 interactions from iRefIndex

---

**Loch-Strickler-2012**

0.33%

A microarray of ubiquitylated proteins for profiling deubiquitylase activity reveals the critical roles of both chain and substrate. Loch et al (2012). *Biochim Biophys Acta*

Physical Interactions with 145 interactions from iRefIndex

---

**IREF-MATRIXDB**

0.32%

Physical Interactions with 249 interactions from iRefIndex

---

| <b>Physical Interactions</b>                                                                                                                                                                                               | <b>67.64%</b> |
|----------------------------------------------------------------------------------------------------------------------------------------------------------------------------------------------------------------------------|---------------|
| <b>Diner-Cristea-2015</b>                                                                                                                                                                                                  | <b>0.32%</b>  |
| Interactions of the Antiviral Factor Interferon Gamma-Inducible Protein 16 (IFI16) Mediate Immune Signaling and Herpes Simplex Virus-1 Immunosuppression. Diner et al (2015). <i>Mol Cell Proteomics</i>                   |               |
| Physical Interactions with 332 interactions from BioGRID                                                                                                                                                                   |               |
| <b>Hein-Mann-2015</b>                                                                                                                                                                                                      | <b>0.31%</b>  |
| A human interactome in three quantitative dimensions organized by stoichiometries and abundances. Hein et al (2015). <i>Cell</i>                                                                                           |               |
| Physical Interactions with 27,044 interactions from BioGRID                                                                                                                                                                |               |
| <b>Lipp-Guthrie-2015</b>                                                                                                                                                                                                   | <b>0.30%</b>  |
| SR protein kinases promote splicing of nonconsensus introns. Lipp et al (2015). <i>Nat Struct Mol Biol</i>                                                                                                                 |               |
| Physical Interactions with 386 interactions from BioGRID                                                                                                                                                                   |               |
| <b>Li-Chen-2015</b>                                                                                                                                                                                                        | <b>0.30%</b>  |
| Proteomic analyses reveal distinct chromatin-associated and soluble transcription factor complexes. Li et al (2015). <i>Mol Syst Biol</i>                                                                                  |               |
| Physical Interactions with 1,809 interactions from BioGRID                                                                                                                                                                 |               |
| <b>Wang-Xu-2015</b>                                                                                                                                                                                                        | <b>0.29%</b>  |
| Interaction of amyotrophic lateral sclerosis/frontotemporal lobar degeneration-associated fused-in-sarcoma with proteins involved in metabolic and protein degradation pathways. Wang et al (2015). <i>Neurobiol Aging</i> |               |
| Physical Interactions with 192 interactions from iRefIndex                                                                                                                                                                 |               |
| <b>Roy-Pardo-2014</b>                                                                                                                                                                                                      | <b>0.29%</b>  |
| hnRNP A1 couples nuclear export and translation of specific mRNAs downstream of FGF-2/S6K2 signalling. Roy et al (2014). <i>Nucleic Acids Res</i>                                                                          |               |
| Physical Interactions with 386 interactions from BioGRID                                                                                                                                                                   |               |
| <b>Kotlyar-Jurisica-2015</b>                                                                                                                                                                                               | <b>0.28%</b>  |
| In silico prediction of physical protein interactions and characterization of interactome orphans. Kotlyar et al (2015). <i>Nat Methods</i>                                                                                |               |
| Physical Interactions with 121 interactions from BioGRID                                                                                                                                                                   |               |
| <b>Barrios-Rodiles-Wrana-2005</b>                                                                                                                                                                                          | <b>0.27%</b>  |
| High-throughput mapping of a dynamic signaling network in mammalian cells. Barrios-Rodiles et al (2005). <i>Science</i>                                                                                                    |               |
| Physical Interactions with 552 interactions from iRefIndex                                                                                                                                                                 |               |
| <b>BIOGRID-SMALL-SCALE-STUDIES</b>                                                                                                                                                                                         | <b>0.27%</b>  |
| Physical Interactions with 58,871 interactions from BioGRID                                                                                                                                                                |               |
| <b>Sowa-Harper-2009</b>                                                                                                                                                                                                    | <b>0.26%</b>  |
| Defining the human deubiquitinating enzyme interaction landscape. Sowa et al (2009). <i>Cell</i>                                                                                                                           |               |
| Physical Interactions with 1,509 interactions from BioGRID                                                                                                                                                                 |               |
| <b>Ramachandran-LaBaer-2004</b>                                                                                                                                                                                            | <b>0.26%</b>  |
| Self-assembling protein microarrays. Ramachandran et al (2004). <i>Science</i>                                                                                                                                             |               |
| Physical Interactions with 112 interactions from iRefIndex                                                                                                                                                                 |               |
| <b>Oshikawa-Nakayama-2012</b>                                                                                                                                                                                              | <b>0.26%</b>  |
| Proteome-wide identification of ubiquitylation sites by conjugation of engineered lysine-less ubiquitin. Oshikawa et al (2012). <i>J Proteome Res</i>                                                                      |               |
| Physical Interactions with 116 interactions from iRefIndex                                                                                                                                                                 |               |
| <b>Bonacci-Soubeyran-2014</b>                                                                                                                                                                                              | <b>0.26%</b>  |

---

**Bonacci-Soubeyran-2014**

Identification of new mechanisms of cellular response to chemotherapy by tracking changes in post-translational modifications by ubiquitin and ubiquitin-like proteins. Bonacci et al (2014). *J Proteome Res*

Physical Interactions with 937 interactions from iRefIndex

---

**Kim-Gygi-2011**

0.26%

Systematic and quantitative assessment of the ubiquitin-modified proteome. Kim et al (2011). *Mol Cell*

Physical Interactions with 1,345 interactions from iRefIndex

---

**Taipale-Lindquist-2012**

0.26%

Quantitative analysis of HSP90-client interactions reveals principles of substrate recognition. Taipale et al (2012). *Cell*

Physical Interactions with 716 interactions from iRefIndex

---

**Wilker-Yaffe-2007**

0.25%

14-3-3sigma controls mitotic translation to facilitate cytokinesis. Wilker et al (2007). *Nature*

Physical Interactions with 110 interactions from iRefIndex

---

**Jin-Pawson-2004**

0.24%

Proteomic, functional, and domain-based analysis of in vivo 14-3-3 binding proteins involved in cytoskeletal regulation and cellular organization. Jin et al (2004). *Curr Biol*

Physical Interactions with 236 interactions from iRefIndex

---

**Oliviero-Cagney-2015**

0.24%

The variant Polycomb Repressor Complex 1 component PCGF1 interacts with a pluripotency sub-network that includes DPPA4, a regulator of embryogenesis. Oliviero et al (2015). *Sci Rep*

Physical Interactions with 675 interactions from BioGRID

---

**IREF-BIND**

0.24%

Physical Interactions with 3,659 interactions from iRefIndex

---

**Hutchins-Peters-2010**

0.24%

Systematic analysis of human protein complexes identifies chromosome segregation proteins. Hutchins et al (2010). *Science*

Physical Interactions with 1,783 interactions from BioGRID

---

**Tong-Moran-2014**

0.23%

Proteomic analysis of the epidermal growth factor receptor (EGFR) interactome and post-translational modifications associated with receptor endocytosis in response to EGF and stress. Tong et al (2014). *Mol Cell Proteomics*

Physical Interactions with 271 interactions from iRefIndex

---

**IREF-MPPI**

0.23%

Physical Interactions with 382 interactions from iRefIndex

---

**Li-Haura-2013**

0.21%

Perturbation of the mutated EGFR interactome identifies vulnerabilities and resistance mechanisms. Li et al (2013). *Mol Syst Biol*

Physical Interactions with 403 interactions from BioGRID

---

**Woods-Monteiro-2012**

0.21%

Charting the landscape of tandem BRCT domain-mediated protein interactions. Woods et al (2012). *Sci Signal*

Physical Interactions with 919 interactions from iRefIndex

---

**Xie-Cong-2013**

0.19%

---

**Xie-Cong-2013**

Deubiquitinase FAM/USP9X interacts with the E3 ubiquitin ligase SMURF1 protein and protects it from ligase activity-dependent self-degradation. Xie et al (2013). *J Biol Chem*

Physical Interactions with 168 interactions from iRefIndex

---

**Malovannaya-Qin-2010**

0.19%

Streamlined analysis schema for high-throughput identification of endogenous protein complexes. Malovannaya et al (2010). *Proc Natl Acad Sci U S A*

Physical Interactions with 224 interactions from iRefIndex

---

**Chen-Zhang-2013**

0.18%

Quantitative study of the interactome of PKC involved in the EGF-induced tumor cell chemotaxis. Chen et al (2013). *J Proteome Res*

Physical Interactions with 180 interactions from iRefIndex

---

**Koch-Hermeking-2007**

0.17%

Large-scale identification of c-MYC-associated proteins using a combined TAP/MudPIT approach. Koch et al (2007). *Cell Cycle*

Physical Interactions with 175 interactions from iRefIndex

---

**Xiao-Lefkowitz-2007**

0.17%

Functional specialization of beta-arrestin interactions revealed by proteomic analysis. Xiao et al (2007). *Proc Natl Acad Sci U S A*

Physical Interactions with 402 interactions from iRefIndex

---

**Napolitano-Meroni-2011**

0.17%

Functional interactions between ubiquitin E2 enzymes and TRIM proteins. Napolitano et al (2011). *Biochem J*

Physical Interactions with 81 interactions from BioGRID

---

**IREF-PUBMED**

0.16%

Physical Interactions with 571 interactions from iRefIndex

---

**Varjosalo-Gstaiger-2013**

0.16%

The protein interaction landscape of the human CMGC kinase group. Varjosalo et al (2013). *Cell Rep*

Physical Interactions with 936 interactions from iRefIndex

---

**So-Colwill-2015**

0.15%

Integrative analysis of kinase networks in TRAIL-induced apoptosis provides a source of potential targets for combination therapy. So et al (2015). *Sci Signal*

Physical Interactions with 647 interactions from BioGRID

---

**Scholz-Taylor-2016**

0.14%

FIH Regulates Cellular Metabolism through Hydroxylation of the Deubiquitinase OTUB1. Scholz et al (2016). *PLoS Biol*

Physical Interactions with 134 interactions from BioGRID

---

**Huttlin-Gygi-2015**

0.14%

The BioPlex Network: A Systematic Exploration of the Human Interactome. Huttlin et al (2015). *Cell*

Physical Interactions with 23,399 interactions from BioGRID

---

**Ingham-Pawson-2005**

0.14%

WW domains provide a platform for the assembly of multiprotein networks. Ingham et al (2005). *Mol Cell Biol*

Physical Interactions with 299 interactions from iRefIndex

---

| <b>Physical Interactions</b>                                                                                                                                                                                                                                                                                                   | <b>67.64%</b> |
|--------------------------------------------------------------------------------------------------------------------------------------------------------------------------------------------------------------------------------------------------------------------------------------------------------------------------------|---------------|
| <b>Tsai-Cristea-2012</b><br>Functional proteomics establishes the interaction of SIRT7 with chromatin remodeling complexes and expands its role in regulation of RNA polymerase I transcription. Tsai et al (2012). <i>Mol Cell Proteomics</i><br>Physical Interactions with 655 interactions from iRefIndex                   | <b>0.13%</b>  |
| <b>Yatim-Benkirane-2012</b><br>NOTCH1 nuclear interactome reveals key regulators of its transcriptional activity and oncogenic function. Yatim et al (2012). <i>Mol Cell</i><br>Physical Interactions with 131 interactions from iRefIndex                                                                                     | <b>0.12%</b>  |
| <b>Thompson-Luchansky-2014</b><br>Quantitative Lys- Gly-Gly (diGly) proteomics coupled with inducible RNAi reveals ubiquitin-mediated proteolysis of DNA damage-inducible transcript 4 (DDIT4) by the E3 ligase HUWE1. Thompson et al (2014). <i>J Biol Chem</i><br>Physical Interactions with 552 interactions from iRefIndex | <b>0.12%</b>  |
| <b>Floyd-Pagliarini-2016</b><br>Mitochondrial Protein Interaction Mapping Identifies Regulators of Respiratory Chain Function. Floyd et al (2016). <i>Mol Cell</i><br>Physical Interactions with 1,508 interactions from BioGRID                                                                                               | <b>0.12%</b>  |
| <b>Bandyopadhyay-Ideker-2010</b><br>A human MAP kinase interactome. Bandyopadhyay et al (2010). <i>Nat Methods</i><br>Physical Interactions with 611 interactions from iRefIndex                                                                                                                                               | <b>0.12%</b>  |
| <b>van Wijk-Timmers-2009</b><br>A comprehensive framework of E2-RING E3 interactions of the human ubiquitin-proteasome system. van Wijk et al (2009). <i>Mol Syst Biol</i><br>Physical Interactions with 301 interactions from iRefIndex                                                                                       | <b>0.11%</b>  |
| <b>IREF-INTACT</b><br>Physical Interactions with 56,297 interactions from iRefIndex                                                                                                                                                                                                                                            | <b>0.11%</b>  |
| <b>Lee-Songyang-2011</b><br>Genome-wide YFP fluorescence complementation screen identifies new regulators for telomere signaling in human cells. Lee et al (2011). <i>Mol Cell Proteomics</i><br>Physical Interactions with 604 interactions from iRefIndex                                                                    | <b>0.11%</b>  |
| <b>Grossmann-Stelzl-2015</b><br>Phospho-tyrosine dependent protein-protein interaction network. Grossmann et al (2015). <i>Mol Syst Biol</i><br>Physical Interactions with 622 interactions from BioGRID                                                                                                                       | <b>0.11%</b>  |
| <b>Liu-Wang-2012</b><br>Proteomic identification of common SCF ubiquitin ligase FBXO6-interacting glycoproteins in three kinds of cells. Liu et al (2012). <i>J Proteome Res</i><br>Physical Interactions with 586 interactions from iRefIndex                                                                                 | <b>0.11%</b>  |
| <b>Povlsen-Choudhary-2012</b><br>Systems-wide analysis of ubiquitylation dynamics reveals a key role for PAF15 ubiquitylation in DNA-damage bypass. Povlsen et al (2012). <i>Nat Cell Biol</i><br>Physical Interactions with 562 interactions from iRefIndex                                                                   | <b>0.10%</b>  |
| <b>Oláh-Ovádi-2011</b><br>Interactions of pathological hallmark proteins: tubulin polymerization promoting protein/p25, beta-amyloid, and alpha-synuclein. Oláh et al (2011). <i>J Biol Chem</i>                                                                                                                               | <b>0.10%</b>  |

---

**Oláh-Ovádi-2011**

Physical Interactions with 1,853 interactions from iRefIndex

---

**Hayes-Urbé-2012**

0.10%

Direct and indirect control of mitogen-activated protein kinase pathway-associated components, BRAP/IMP E3 ubiquitin ligase and CRAF/RAF1 kinase, by the deubiquitylating enzyme USP15. Hayes et al (2012). *J Biol Chem*

Physical Interactions with 107 interactions from iRefIndex

---

**Joshi-Cristea-2013**

0.10%

The functional interactome landscape of the human histone deacetylase family. Joshi et al (2013). *Mol Syst Biol*

Physical Interactions with 310 interactions from iRefIndex

---

**Roy-Parent-2013**

0.10%

Novel, gel-free proteomics approach identifies RNF5 and JAMP as modulators of GPCR stability. Roy et al (2013). *Mol Endocrinol*

Physical Interactions with 155 interactions from iRefIndex

---

**Ewing-Figeys-2007**

0.10%

Large-scale mapping of human protein-protein interactions by mass spectrometry. Ewing et al (2007). *Mol Syst Biol*

Physical Interactions with 5,362 interactions from iRefIndex

---

**Zanon-Pichler-2013**

0.09%

Profiling of Parkin-binding partners using tandem affinity purification. Zanon et al (2013). *PLoS One*

Physical Interactions with 187 interactions from iRefIndex

---

**Brajenovic-Drewes-2004**

0.09%

Comprehensive proteomic analysis of human Par protein complexes reveals an interconnected protein network. Brajenovic et al (2004). *J Biol Chem*

Physical Interactions with 141 interactions from iRefIndex

---

**Greco-Cristea-2011**

0.09%

Nuclear import of histone deacetylase 5 by requisite nuclear localization signal phosphorylation. Greco et al (2011). *Mol Cell Proteomics*

Physical Interactions with 240 interactions from iRefIndex

---

**Wu-Li-2007**

0.09%

Systematic identification of SH3 domain-mediated human protein-protein interactions by peptide array target screening. Wu et al (2007). *Proteomics*

Physical Interactions with 927 interactions from iRefIndex

---

**Behrends-Harper-2010**

0.09%

Network organization of the human autophagy system. Behrends et al (2010). *Nature*

Physical Interactions with 751 interactions from iRefIndex

---

**Nakayasu-Adkins-2013**

0.09%

Evaluation of selected binding domains for the analysis of ubiquitinated proteomes. Nakayasu et al (2013). *J Am Soc Mass Spectrom*

Physical Interactions with 880 interactions from iRefIndex

---

**Ouyang-Gill-2009**

0.08%

Direct binding of CoREST1 to SUMO-2/3 contributes to gene-specific repression by the LSD1/CoREST1/HDAC complex. Ouyang et al (2009). *Mol Cell*

---



---

**Ouyang-Gill-2009**

Physical Interactions with 105 interactions from BioGRID

---

**Perez-Hernandez-Yáñez-Mó-2013**

0.08%

The intracellular interactome of tetraspanin-enriched microdomains reveals their function as sorting machineries toward exosomes. Perez-Hernandez et al (2013). *J Biol Chem*

Physical Interactions with 450 interactions from iRefIndex

---

**Reyniers-Taymans-2014**

0.08%

Differential protein-protein interactions of LRRK1 and LRRK2 indicate roles in distinct cellular signaling pathways. Reyniers et al (2014). *J Neurochem*

Physical Interactions with 102 interactions from iRefIndex

---

**Bruderer-Hay-2011**

0.08%

Purification and identification of endogenous polySUMO conjugates. Bruderer et al (2011). *EMBO Rep*

Physical Interactions with 106 interactions from iRefIndex

---

**Couzens-Gingras-2013**

0.08%

Protein interaction network of the mammalian Hippo pathway reveals mechanisms of kinase-phosphatase interactions. Couzens et al (2013). *Sci Signal*

Physical Interactions with 364 interactions from BioGRID

---

**Bennett-Harper-2010**

0.08%

Dynamics of cullin-RING ubiquitin ligase network revealed by systematic quantitative proteomics. Bennett et al (2010). *Cell*

Physical Interactions with 4,367 interactions from BioGRID

---

**Christianson-Kopito-2011**

0.07%

Defining human ERAD networks through an integrative mapping strategy. Christianson et al (2011). *Nat Cell Biol*

Physical Interactions with 260 interactions from iRefIndex

---

**Albers-Koegl-2005**

0.07%

Automated yeast two-hybrid screening for nuclear receptor-interacting proteins. Albers et al (2005). *Mol Cell Proteomics*

Physical Interactions with 238 interactions from iRefIndex

---

**Thalappilly-Dusetti-2008**

0.07%

Identification of multi-SH3 domain-containing protein interactome in pancreatic cancer: a yeast two-hybrid approach. Thalappilly et al (2008). *Proteomics*

Physical Interactions with 104 interactions from iRefIndex

---

**Gupta-Pelletier-2015**

0.07%

A Dynamic Protein Interaction Landscape of the Human Centrosome-Cilium Interface. Gupta et al (2015). *Cell*

Physical Interactions with 307 interactions from BioGRID

---

**Vinayagam-Wanker-2011**

0.06%

A directed protein interaction network for investigating intracellular signal transduction. Vinayagam et al (2011). *Sci Signal*

Physical Interactions with 2,576 interactions from BioGRID

---

**Li-Dorf-2014**

0.06%

TRIM65 regulates microRNA activity by ubiquitination of TNRC6. Li et al (2014). *Proc Natl Acad Sci U S A*

Physical Interactions with 470 interactions from iRefIndex

---

**Katsogiannou-Rocchi-2014**

0.06%

---

**Katsogiannou-Rocchi-2014**

The functional landscape of Hsp27 reveals new cellular processes such as DNA repair and alternative splicing and proposes novel anticancer targets. Katsogiannou et al (2014). *Mol Cell Proteomics*

Physical Interactions with 217 interactions from iRefIndex

---

**Arbuckle-Grant-2010**

0.05%

The SH3 domain of postsynaptic density 95 mediates inflammatory pain through phosphatidylinositol-3-kinase recruitment. Arbuckle et al (2010). *EMBO Rep*

Physical Interactions with 268 interactions from iRefIndex

---

**Bantscheff-Drewes-2011**

0.05%

Chemoproteomics profiling of HDAC inhibitors reveals selective targeting of HDAC complexes. Bantscheff et al (2011). *Nat Biotechnol*

Physical Interactions with 103 interactions from BioGRID

---

**Low-Heck-2014**

0.04%

A systems-wide screen identifies substrates of the SCF TrCP ubiquitin ligase. Low et al (2014). *Sci Signal*

Physical Interactions with 221 interactions from BioGRID

---

**Lau-Ronai-2012**

0.04%

PKC promotes oncogenic functions of ATF2 in the nucleus while blocking its apoptotic function at mitochondria. Lau et al (2012). *Cell*

Physical Interactions with 134 interactions from iRefIndex

---

**Kirh-Görlich-2015**

0.04%

A deep proteomics perspective on CRM1-mediated nuclear export and nucleocytoplasmic partitioning. Kirh et al (2015). *Elife*

Physical Interactions with 1,036 interactions from BioGRID

---

**Woodsmith-Sanderson-2012**

0.04%

Systematic analysis of dimeric E3-RING interactions reveals increased combinatorial complexity in human ubiquitination networks. Woodsmith et al (2012). *Mol Cell Proteomics*

Physical Interactions with 212 interactions from iRefIndex

---

**Zhang-Zou-2011**

0.03%

A bead-based approach for large-scale identification of in vitro kinase substrates. Zhang et al (2011). *Proteomics*

Physical Interactions with 162 interactions from iRefIndex

---

**Leng-Wang-2014**

0.03%

A proteomics strategy for the identification of FAT10-modified sites by mass spectrometry. Leng et al (2014). *J Proteome Res*

Physical Interactions with 144 interactions from iRefIndex

---

**Bogachek-Weigel-2014**

0.02%

Sumoylation pathway is required to maintain the basal breast cancer subtype. Bogachek et al (2014). *Cancer Cell*

Physical Interactions with 134 interactions from iRefIndex

---

**Hanson-Clayton-2014**

0.02%

Identifying biological pathways that underlie primordial short stature using network analysis. Hanson et al (2014). *J Mol Endocrinol*

Physical Interactions with 1,687 interactions from iRefIndex

---

**Markson-Sanderson-2009**

0.02%

Analysis of the human E2 ubiquitin conjugating enzyme protein interaction network. Markson et al (2009). *Genome Res*

---

## Physical Interactions

67.64%

---

### Markson-Sanderson-2009

Physical Interactions with 700 interactions from iRefIndex

---

### Golebiowski-Hay-2009

0.02%

System-wide changes to SUMO modifications in response to heat shock. Golebiowski et al (2009). *Sci Signal*

Physical Interactions with 351 interactions from iRefIndex

---

### Yang-Chen-2010

0.02%

Proteomic dissection of cell type-specific H2AX-interacting protein complex associated with hepatocellular carcinoma. Yang et al (2010). *J Proteome Res*

Physical Interactions with 100 interactions from BioGRID

---

### Ravasi-Hayashizaki-2010

0.02%

An atlas of combinatorial transcriptional regulation in mouse and man. Ravasi et al (2010). *Cell*

Physical Interactions with 635 interactions from iRefIndex

---

### Arroyo-Aloy-2015

0.02%

Systematic identification of molecular links between core and candidate genes in breast cancer. Arroyo et al (2015). *J Mol Biol*

Physical Interactions with 600 interactions from iRefIndex

---

### IREF-HPRD

0.02%

Physical Interactions with 34,206 interactions from iRefIndex

---

### Pichlmair-Supert-Furga-2012

0.02%

Viral immune modulators perturb the human molecular network by common and unique strategies. Pichlmair et al (2012). *Nature*

Physical Interactions with 14 interactions from BioGRID

---

### Virok-Fülöp-2011

0.02%

Protein array based interactome analysis of amyloid- indicates an inhibition of protein translation. Virok et al (2011). *J Proteome Res*

Physical Interactions with 299 interactions from BioGRID

---

### Vermeulen-Mann-2010

0.01%

Quantitative interaction proteomics and genome-wide profiling of epigenetic histone marks and their readers. Vermeulen et al (2010). *Cell*

Physical Interactions with 131 interactions from iRefIndex

---

### Grant-2010

0.01%

Identification of SUMOylated proteins in neuroblastoma cells after treatment with hydrogen peroxide or ascorbate. Grant (2010). *BMB Rep*

Physical Interactions with 114 interactions from iRefIndex

---

### Meek-Piwnica-Worms-2004

0.01%

Comprehensive proteomic analysis of interphase and mitotic 14-3-3-binding proteins. Meek et al (2004). *J Biol Chem*

Physical Interactions with 359 interactions from iRefIndex

---

### Soler-López-Aloy-2011

0.01%

Interactome mapping suggests new mechanistic details underlying Alzheimer's disease. Soler-López et al (2011). *Genome Res*

Physical Interactions with 312 interactions from iRefIndex

---

### Yu-Vidal-2011

0.01%

Next-generation sequencing to generate interactome datasets. Yu et al (2011). *Nat Methods*

---

## Physical Interactions

67.64%

---

### Yu-Vidal-2011

Physical Interactions with 1,108 interactions from BioGRID

---

### Weimann-Stelzl-2013 A

0.00%

A Y2H-seq approach defines the human protein methyltransferase interactome. Weimann et al (2013). *Nat Methods*

Physical Interactions with 114 interactions from BioGRID

---

### Wong-O'Bryan-2012

0.00%

Intersectin (ITSN) family of scaffolds function as molecular hubs in protein interaction networks. Wong et al (2012). *PLoS One*

Physical Interactions with 111 interactions from iRefIndex

---

### Kim-Major-2015

0.00%

Substrate trapping proteomics reveals targets of the TrCP2/FBXW11 ubiquitin ligase. Kim et al (2015). *Mol Cell Biol*

Physical Interactions with 114 interactions from iRefIndex

---

## Co-expression

13.50%

---

### Ramaswamy-Golub-2001

1.02%

Multiclass cancer diagnosis using tumor gene expression signatures. Ramaswamy et al (2001). *Proc Natl Acad Sci U S A*

Co-expression with 275,113 interactions from supplementary material

---

### Wang-Maris-2006

0.95%

Integrative genomics identifies distinct molecular classes of neuroblastoma and shows that multiple genes are targeted by regional alterations in DNA copy number. Wang et al (2006). *Cancer Res*

Co-expression with 264,023 interactions from GEO

---

### Mallon-McKay-2013

0.86%

StemCellDB: the human pluripotent stem cell database at the National Institutes of Health. Mallon et al (2013). *Stem Cell Res*

Co-expression with 585,265 interactions from GEO

---

### Bild-Nevins-2006 B

0.85%

Oncogenic pathway signatures in human cancers as a guide to targeted therapies. Bild et al (2006). *Nature*

Co-expression with 280,683 interactions from GEO

---

### Burington-Shaughnessy-2008

0.80%

Tumor cell gene expression changes following short-term in vivo exposure to single agent chemotherapeutics are related to survival in multiple myeloma. Burington et al (2008). *Clin Cancer Res*

Co-expression with 290,538 interactions from GEO

---

### Dobbin-Giordano-2005

0.78%

Interlaboratory comparability study of cancer gene expression analysis using oligonucleotide microarrays. Dobbin et al (2005). *Clin Cancer Res*

Co-expression with 444,931 interactions from GEO

---

### Bahr-Bowler-2013

0.70%

Peripheral blood mononuclear cell gene expression in chronic obstructive pulmonary disease. Bahr et al (2013). *Am J Respir Cell Mol Biol*

Co-expression with 274,949 interactions from GEO

---

### Alizadeh-Staudt-2000

0.69%

Distinct types of diffuse large B-cell lymphoma identified by gene expression profiling. Alizadeh et al (2000). *Nature*

Co-expression with 90,336 interactions from supplementary material

---

| <b>Co-expression</b>                                                                                                                                                    | <b>13.50%</b> |
|-------------------------------------------------------------------------------------------------------------------------------------------------------------------------|---------------|
| <b>Innocenti-Brown-2011</b>                                                                                                                                             | <b>0.69%</b>  |
| Identification, replication, and functional fine-mapping of expression quantitative trait loci in primary human liver tissue. Innocenti et al (2011). <i>PLoS Genet</i> |               |
| Co-expression with 603,765 interactions from GEO                                                                                                                        |               |
| <b>Rieger-Chu-2004</b>                                                                                                                                                  | <b>0.66%</b>  |
| Toxicity from radiation therapy associated with abnormal transcriptional responses to DNA damage. Rieger et al (2004). <i>Proc Natl Acad Sci U S A</i>                  |               |
| Co-expression with 259,974 interactions from GEO                                                                                                                        |               |
| <b>Noble-Diehl-2008</b>                                                                                                                                                 | <b>0.65%</b>  |
| Regional variation in gene expression in the healthy colon is dysregulated in ulcerative colitis. Noble et al (2008). <i>Gut</i>                                        |               |
| Co-expression with 661,539 interactions from GEO                                                                                                                        |               |
| <b>Roth-Zlotnik-2006</b>                                                                                                                                                | <b>0.61%</b>  |
| Gene expression analyses reveal molecular relationships among 20 regions of the human CNS. Roth et al (2006). <i>Neurogenetics</i>                                      |               |
| Co-expression with 669,062 interactions from GEO                                                                                                                        |               |
| <b>Boldrick-Relman-2002</b>                                                                                                                                             | <b>0.60%</b>  |
| Stereotyped and specific gene expression programs in human innate immune responses to bacteria. Boldrick et al (2002). <i>Proc Natl Acad Sci U S A</i>                  |               |
| Co-expression with 111,707 interactions from supplementary material                                                                                                     |               |
| <b>Perou-Botstein-2000</b>                                                                                                                                              | <b>0.59%</b>  |
| Molecular portraits of human breast tumours. Perou et al (2000). <i>Nature</i>                                                                                          |               |
| Co-expression with 185,068 interactions from supplementary material                                                                                                     |               |
| <b>Smirnov-Cheung-2009</b>                                                                                                                                              | <b>0.58%</b>  |
| Genetic analysis of radiation-induced changes in human gene expression. Smirnov et al (2009). <i>Nature</i>                                                             |               |
| Co-expression with 461,500 interactions from GEO                                                                                                                        |               |
| <b>Wang-Cheung-2015</b>                                                                                                                                                 | <b>0.57%</b>  |
| Genetic variation in insulin-induced kinase signaling. Wang et al (2015). <i>Mol Syst Biol</i>                                                                          |               |
| Co-expression with 411,047 interactions from GEO                                                                                                                        |               |
| <b>Chen-Brown-2002</b>                                                                                                                                                  | <b>0.51%</b>  |
| Gene expression patterns in human liver cancers. Chen et al (2002). <i>Mol Biol Cell</i>                                                                                |               |
| Co-expression with 282,241 interactions from supplementary material                                                                                                     |               |
| <b>Perou-Botstein-1999</b>                                                                                                                                              | <b>0.50%</b>  |
| Distinctive gene expression patterns in human mammary epithelial cells and breast cancers. Perou et al (1999). <i>Proc Natl Acad Sci U S A</i>                          |               |
| Co-expression with 65,069 interactions from supplementary material                                                                                                      |               |
| <b>Wu-Garvey-2007</b>                                                                                                                                                   | <b>0.48%</b>  |
| The effect of insulin on expression of genes and biochemical pathways in human skeletal muscle. Wu et al (2007). <i>Endocrine</i>                                       |               |
| Co-expression with 267,109 interactions from GEO                                                                                                                        |               |
| <b>Rosenwald-Staudt-2001</b>                                                                                                                                            | <b>0.40%</b>  |
| Relation of gene expression phenotype to immunoglobulin mutation genotype in B cell chronic lymphocytic leukemia. Rosenwald et al (2001). <i>J Exp Med</i>              |               |
| Co-expression with 114,694 interactions from supplementary material                                                                                                     |               |

|                                                                                                                                                                                                         |              |
|---------------------------------------------------------------------------------------------------------------------------------------------------------------------------------------------------------|--------------|
| <b>Predicted</b>                                                                                                                                                                                        | <b>6.35%</b> |
| <b>I2D-vonMering-Bork-2002-High-Yeast2Human</b>                                                                                                                                                         | <b>0.89%</b> |
| Comparative assessment of large-scale data sets of protein-protein interactions. von Mering et al (2002). <i>Nature</i><br>Predicted with 1,196 interactions from I2D                                   |              |
| <b>I2D-vonMering-Bork-2002-Medium-Yeast2Human</b>                                                                                                                                                       | <b>0.59%</b> |
| Comparative assessment of large-scale data sets of protein-protein interactions. von Mering et al (2002). <i>Nature</i><br>Predicted with 3,009 interactions from I2D                                   |              |
| <b>I2D-BioGRID-Yeast2Human</b>                                                                                                                                                                          | <b>0.50%</b> |
| BioGRID: a general repository for interaction datasets. Stark et al (2006). <i>Nucleic Acids Res</i><br>Predicted with 13,434 interactions from I2D                                                     |              |
| <b>I2D-Chen-Pawson-2009-PiwiScreen-Mouse2Human</b>                                                                                                                                                      | <b>0.46%</b> |
| Mouse Piwi interactome identifies binding mechanism of Tdrkh Tudor domain to arginine methylated Miwi. Chen et al (2009).<br><i>Proc Natl Acad Sci U S A</i><br>Predicted with 31 interactions from I2D |              |
| <b>I2D-INNATEDB-Mouse2Human</b>                                                                                                                                                                         | <b>0.42%</b> |
| InnateDB: facilitating systems-level analyses of the mammalian innate immune response. Lynn et al (2008). <i>Mol Syst Biol</i><br>Predicted with 1,451 interactions from I2D                            |              |
| <b>I2D-Tarassov-PCA-Yeast2Human</b>                                                                                                                                                                     | <b>0.40%</b> |
| An in vivo map of the yeast protein interactome. Tarassov et al (2008). <i>Science</i><br>Predicted with 440 interactions from I2D                                                                      |              |
| <b>I2D-vonMering-Bork-2002-Low-Yeast2Human</b>                                                                                                                                                          | <b>0.38%</b> |
| Comparative assessment of large-scale data sets of protein-protein interactions. von Mering et al (2002). <i>Nature</i><br>Predicted with 16,063 interactions from I2D                                  |              |
| <b>Wu-Stein-2010</b>                                                                                                                                                                                    | <b>0.34%</b> |
| A human functional protein interaction network and its application to cancer data analysis. Wu et al (2010). <i>Genome Biol</i><br>Predicted with 87,829 interactions from supplementary material       |              |
| <b>I2D-IntAct-Mouse2Human</b>                                                                                                                                                                           | <b>0.31%</b> |
| The IntAct molecular interaction database in 2010. Aranda et al (2010). <i>Nucleic Acids Res</i><br>Predicted with 3,427 interactions from I2D                                                          |              |
| <b>Stuart-Kim-2003</b>                                                                                                                                                                                  | <b>0.27%</b> |
| A gene-coexpression network for global discovery of conserved genetic modules. Stuart et al (2003). <i>Science</i><br>Predicted with 24,872 interactions from supplementary material                    |              |
| <b>I2D-Yu-Vidal-2008-GoldStd-Yeast2Human</b>                                                                                                                                                            | <b>0.22%</b> |
| High-quality binary protein interaction map of the yeast interactome network. Yu et al (2008). <i>Science</i><br>Predicted with 386 interactions from I2D                                               |              |
| <b>I2D-Krogan-Greenblatt-2006-Core-Yeast2Human</b>                                                                                                                                                      | <b>0.19%</b> |
| Global landscape of protein complexes in the yeast <i>Saccharomyces cerevisiae</i> . Krogan et al (2006). <i>Nature</i><br>Predicted with 1,823 interactions from I2D                                   |              |
| <b>I2D-BIND-Rat2Human</b>                                                                                                                                                                               | <b>0.19%</b> |
| BIND--a data specification for storing and describing biomolecular interactions, molecular complexes and pathways. Bader et al                                                                          |              |

| <b>Predicted</b>                                                                                                                                                                                                                          | <b>6.35%</b> |
|-------------------------------------------------------------------------------------------------------------------------------------------------------------------------------------------------------------------------------------------|--------------|
| <b>I2D-BIND-Rat2Human</b><br>(2000). <i>Bioinformatics</i><br>Predicted with 548 interactions from I2D                                                                                                                                    |              |
| <b>I2D-BioGRID-Worm2Human</b><br>BioGRID: a general repository for interaction datasets. Stark et al (2006). <i>Nucleic Acids Res</i><br>Predicted with 952 interactions from I2D                                                         | <b>0.18%</b> |
| <b>I2D-MINT-Rat2Human</b><br>MINT: a Molecular INTeraction database. Zanzoni et al (2002). <i>FEBS Lett</i><br>Predicted with 572 interactions from I2D                                                                                   | <b>0.17%</b> |
| <b>I2D-MINT-Mouse2Human</b><br>MINT: a Molecular INTeraction database. Zanzoni et al (2002). <i>FEBS Lett</i><br>Predicted with 971 interactions from I2D                                                                                 | <b>0.15%</b> |
| <b>I2D-BIND-Mouse2Human</b><br>BIND--a data specification for storing and describing biomolecular interactions, molecular complexes and pathways. Bader et al (2000). <i>Bioinformatics</i><br>Predicted with 1,186 interactions from I2D | <b>0.14%</b> |
| <b>I2D-BioGRID-Mouse2Human</b><br>BioGRID: a general repository for interaction datasets. Stark et al (2006). <i>Nucleic Acids Res</i><br>Predicted with 286 interactions from I2D                                                        | <b>0.12%</b> |
| <b>I2D-BIND-Yeast2Human</b><br>BIND--a data specification for storing and describing biomolecular interactions, molecular complexes and pathways. Bader et al (2000). <i>Bioinformatics</i><br>Predicted with 1,541 interactions from I2D | <b>0.11%</b> |
| <b>I2D-Krogan-Greenblatt-2006-NonCore-Yeast2Human</b><br>Global landscape of protein complexes in the yeast <i>Saccharomyces cerevisiae</i> . Krogan et al (2006). <i>Nature</i><br>Predicted with 1,786 interactions from I2D            | <b>0.09%</b> |
| <b>I2D-IntAct-Fly2Human</b><br>The IntAct molecular interaction database in 2010. Aranda et al (2010). <i>Nucleic Acids Res</i><br>Predicted with 3,912 interactions from I2D                                                             | <b>0.09%</b> |
| <b>I2D-Formstecher-Daviet-2005-Embryo-Fly2Human</b><br>Protein interaction mapping: a <i>Drosophila</i> case study. Formstecher et al (2005). <i>Genome Res</i><br>Predicted with 491 interactions from I2D                               | <b>0.07%</b> |
| <b>I2D-MGI-Mouse2Human</b><br>Ontological visualization of protein-protein interactions. Drabkin et al (2005). <i>BMC Bioinformatics</i><br>Predicted with 726 interactions from I2D                                                      | <b>0.07%</b> |
| <b>I2D-IntAct-Rat2Human</b><br>The IntAct molecular interaction database in 2010. Aranda et al (2010). <i>Nucleic Acids Res</i><br>Predicted with 1,052 interactions from I2D                                                             | <b>0.01%</b> |
| <b>I2D-MINT-Worm2Human</b>                                                                                                                                                                                                                | <b>0.00%</b> |

|                                                                                                                                                                            |       |
|----------------------------------------------------------------------------------------------------------------------------------------------------------------------------|-------|
| <b>Predicted</b>                                                                                                                                                           | 6.35% |
| <b>I2D-MINT-Worm2Human</b>                                                                                                                                                 |       |
| MINT: a Molecular INTeraction database. Zanzoni et al (2002). <i>FEBS Lett</i>                                                                                             |       |
| Predicted with 1,178 interactions from I2D                                                                                                                                 |       |
| <b>Co-localization</b>                                                                                                                                                     | 6.17% |
| <b>Zhang-Shang-2006</b>                                                                                                                                                    | 2.58% |
| The catalytic subunit of the proteasome is engaged in the entire process of estrogen receptor-regulated transcription. Zhang et al (2006). <i>EMBO J</i>                   |       |
| Co-localization with 53 interactions from BioGRID                                                                                                                          |       |
| <b>Schadt-Shoemaker-2004</b>                                                                                                                                               | 1.65% |
| A comprehensive transcript index of the human genome generated using microarrays and computational approaches. Schadt et al (2004). <i>Genome Biol</i>                     |       |
| Co-localization with 60,126 interactions from GEO                                                                                                                          |       |
| <b>Johnson-Shoemaker-2003</b>                                                                                                                                              | 1.11% |
| Genome-wide survey of human alternative pre-mRNA splicing with exon junction microarrays. Johnson et al (2003). <i>Science</i>                                             |       |
| Co-localization with 426,332 interactions from GEO                                                                                                                         |       |
| <b>Chen-Huang-2014</b>                                                                                                                                                     | 0.82% |
| Using an in situ proximity ligation assay to systematically profile endogenous protein-protein interactions in a pathway network. Chen et al (2014). <i>J Proteome Res</i> |       |
| Co-localization with 559 interactions from BioGRID                                                                                                                         |       |
| <b>Pathway</b>                                                                                                                                                             | 4.35% |
| <b>Wu-Stein-2010</b>                                                                                                                                                       | 1.54% |
| A human functional protein interaction network and its application to cancer data analysis. Wu et al (2010). <i>Genome Biol</i>                                            |       |
| Pathway with 78,010 interactions from supplementary material                                                                                                               |       |
| <b>REACTOME</b>                                                                                                                                                            | 1.33% |
| Pathway with 24,913 interactions from Pathway Commons                                                                                                                      |       |
| <b>NCI_NATURE</b>                                                                                                                                                          | 0.58% |
| Pathway with 10,122 interactions from Pathway Commons                                                                                                                      |       |
| <b>CELL_MAP</b>                                                                                                                                                            | 0.46% |
| Pathway with 598 interactions from Pathway Commons                                                                                                                         |       |
| <b>IMID</b>                                                                                                                                                                | 0.41% |
| Pathway with 1,073 interactions from Pathway Commons                                                                                                                       |       |
| <b>HUMANCYC</b>                                                                                                                                                            | 0.03% |
| Pathway with 680 interactions from Pathway Commons                                                                                                                         |       |
| <b>Genetic Interactions</b>                                                                                                                                                | 1.40% |
| <b>Vizeacoumar-Moffat-2013</b>                                                                                                                                             | 0.41% |
| A negative genetic interaction map in isogenic cancer cell lines reveals cancer cell vulnerabilities. Vizeacoumar et al (2013). <i>Mol Syst Biol</i>                       |       |
| Genetic Interactions with 201 interactions from BioGRID                                                                                                                    |       |
| <b>BIOGRID-SMALL-SCALE-STUDIES</b>                                                                                                                                         | 0.38% |



|                                                                                                                                   |       |
|-----------------------------------------------------------------------------------------------------------------------------------|-------|
| <b>Genetic Interactions</b>                                                                                                       | 1.40% |
| <hr/>                                                                                                                             |       |
| <b>BIOGRID-SMALL-SCALE-STUDIES</b>                                                                                                |       |
| Genetic Interactions with 489 interactions from BioGRID                                                                           |       |
| <hr/>                                                                                                                             |       |
| <b>Toyoshima-Grandori-2012</b>                                                                                                    | 0.28% |
| Functional genomics identifies therapeutic targets for MYC-driven cancer. Toyoshima et al (2012). <i>Proc Natl Acad Sci U S A</i> |       |
| Genetic Interactions with 101 interactions from BioGRID                                                                           |       |
| <hr/>                                                                                                                             |       |
| <b>IREF-SMALL-SCALE-STUDIES</b>                                                                                                   | 0.24% |
| Genetic Interactions with 35 interactions from iRefIndex                                                                          |       |
| <hr/>                                                                                                                             |       |
| <b>Blomen-Brummelkamp-2015</b>                                                                                                    | 0.08% |
| Gene essentiality and synthetic lethality in haploid human cells. Blomen et al (2015). <i>Science</i>                             |       |
| Genetic Interactions with 127 interactions from BioGRID                                                                           |       |
| <hr/>                                                                                                                             |       |
| <b>Willingham-Muchowski-2003</b>                                                                                                  | 0.00% |
| Yeast genes that enhance the toxicity of a mutant huntingtin fragment or alpha-synuclein. Willingham et al (2003). <i>Science</i> |       |
| Genetic Interactions with 37 interactions from BioGRID                                                                            |       |
| <hr/>                                                                                                                             |       |
| <b>Shared protein domains</b>                                                                                                     | 0.59% |
| <hr/>                                                                                                                             |       |
| <b>INTERPRO</b>                                                                                                                   | 0.38% |
| Shared protein domains with 608,863 interactions from InterPro                                                                    |       |
| <hr/>                                                                                                                             |       |
| <b>PFAM</b>                                                                                                                       | 0.21% |
| Shared protein domains with 457,054 interactions from Pfam                                                                        |       |
